# Supplementary material for: Modulation of Cardiometabolic Disease Markers by Type I Interferon Inhibition in Systemic Lupus Erythematosus
Source: PubMed Central journal article supplement — Arthritis Rheumatol. Author manuscript; Available in PMC 2024 Aug 6. (PMC11302498; doi:10.1002/art.41518), 2021-02-15
Supplement: NIHMS2011128-supplement-Supp_Table_1.pdf [file NIHMS2011128-supplement-Supp_Table_1.pdf]

**Supplementary Table 1. Analyte correlations**

The correlation between analyte pairs was analyzed using Spearman's rank correlation.

Analyte pairs with a false discovery rate (FDR) of <0.05 are highlighted in orange.

Abbreviations are defined below the table.

| Analyte               | Analyte                        | n   | rho        | P-value   | FDR       |
|-----------------------|--------------------------------|-----|------------|-----------|-----------|
| 21-IFNGS              | Lymphocyte count               | 296 | -4.944E-01 | <E-14     | <E-14     |
| 21-IFNGS              | ANG2                           | 301 | 4.667E-01  | <E-14     | <E-14     |
| 21-IFNGS              | VCAM1                          | 301 | 4.669E-01  | <E-14     | <E-14     |
| 21-IFNGS              | Ficolin 3                      | 301 | 4.765E-01  | <E-14     | <E-14     |
| 21-IFNGS              | IL-10                          | 253 | 5.063E-01  | <E-14     | <E-14     |
| 21-IFNGS              | B2M                            | 300 | 5.159E-01  | <E-14     | <E-14     |
| 21-IFNGS              | ITAC                           | 301 | 5.622E-01  | <E-14     | <E-14     |
| 21-IFNGS              | Progranulin                    | 301 | 5.699E-01  | <E-14     | <E-14     |
| 21-IFNGS              | BAFF                           | 301 | 5.700E-01  | <E-14     | <E-14     |
| 21-IFNGS              | TNF-α                          | 253 | 6.089E-01  | <E-14     | <E-14     |
| 21-IFNGS              | IP-10                          | 301 | 6.266E-01  | <E-14     | <E-14     |
| 21-IFNGS              | MIP3-β                         | 301 | 6.270E-01  | <E-14     | <E-14     |
| 21-IFNGS              | MCP2                           | 301 | 6.674E-01  | <E-14     | <E-14     |
| 21-IFNGS              | IFN-α protein (pg/mL)          | 255 | 8.181E-01  | <E-14     | <E-14     |
| 21-IFNGS              | BLC                            | 301 | 4.314E-01  | <E-14     | 3.610E-14 |
| 21-IFNGS              | IFN-γ                          | 255 | 4.592E-01  | 1.044E-14 | 8.170E-14 |
| 21-IFNGS              | IL-2                           | 252 | 4.047E-01  | 2.368E-11 | 1.440E-10 |
| 21-IFNGS              | MCP1                           | 301 | 3.392E-01  | 1.539E-09 | 7.930E-09 |
| 21-IFNGS              | IgE                            | 301 | 3.268E-01  | 6.374E-09 | 3.150E-08 |
| 21-IFNGS              | von Willebrand factor          | 300 | 3.273E-01  | 6.365E-09 | 3.150E-08 |
| 21-IFNGS              | Leukocyte count                | 296 | -3.258E-01 | 9.527E-09 | 4.630E-08 |
| 21-IFNGS              | IL1RII                         | 301 | -2.870E-01 | 4.092E-07 | 1.800E-06 |
| 21-IFNGS              | TRAILR3                        | 301 | -2.420E-01 | 2.197E-05 | 8.080E-05 |
| 21-IFNGS              | Eotaxin-2                      | 301 | -2.140E-01 | 1.836E-04 | 6.100E-04 |
| 21-IFNGS              | HDL in the H3P size range (μM) | 50  | -4.562E-01 | 8.692E-04 | 2.608E-03 |
| 21-IFNGS              | Neutrophil number              | 296 | -1.823E-01 | 1.634E-03 | 4.675E-03 |
| 21-IFNGS              | CitH3-DNA                      | 188 | 2.218E-01  | 2.219E-03 | 6.164E-03 |
| 21-IFNGS              | HDLC (mg/dL)                   | 50  | -4.073E-01 | 3.330E-03 | 8.877E-03 |
| 21-IFNGS              | MPO-DNA                        | 188 | 2.120E-01  | 3.492E-03 | 9.195E-03 |
| 21-IFNGS              | NE-DNA                         | 188 | 2.052E-01  | 4.724E-03 | 1.169E-02 |
| 21-IFNGS              | Total cholesterol (mg/dL)      | 50  | -3.902E-01 | 5.084E-03 | 1.244E-02 |
| 21-IFNGS              | Ferritin                       | 301 | 1.515E-01  | 8.486E-03 | 1.964E-02 |
| 21-IFNGS              | Apolipoprotein A1 (mg/dL)      | 50  | -3.655E-01 | 9.044E-03 | 2.062E-02 |
| 21-IFNGS              | Medium cHDLP (μM)              | 50  | -3.597E-01 | 1.031E-02 | 2.294E-02 |
| 21-IFNGS              | cHDLP (μM)                     | 50  | -2.277E-01 | 1.118E-01 | 1.796E-01 |
| 21-IFNGS              | CEC                            | 129 | -1.211E-01 | 1.716E-01 | 2.620E-01 |
| 21-IFNGS              | Medium TRLP (nM)               | 50  | 1.813E-01  | 2.077E-01 | 3.079E-01 |
| 21-IFNGS              | IR                             | 121 | 1.063E-01  | 2.458E-01 | 3.504E-01 |
| 21-IFNGS              | Very Small TRLP (nM)           | 50  | 1.234E-01  | 3.932E-01 | 5.031E-01 |
| 21-IFNGS              | GlycA                          | 50  | -1.005E-01 | 4.875E-01 | 5.924E-01 |
| 21-IFNGS              | Very Large TRLP (nM)           | 50  | -3.916E-02 | 7.872E-01 | 8.440E-01 |
| IFN-α protein (pg/mL) | ANG2                           | 256 | 5.181E-01  | <E-14     | <E-14     |
| IFN-α protein (pg/mL) | B2M                            | 255 | 5.246E-01  | <E-14     | <E-14     |
| IFN-α protein (pg/mL) | BAFF                           | 256 | 6.193E-01  | <E-14     | <E-14     |
| IFN-α protein (pg/mL) | Ficolin 3                      | 256 | 4.513E-01  | 3.020E-14 | 2.280E-13 |
| IFN-α protein (pg/mL) | BLC                            | 256 | 4.340E-01  | 3.491E-13 | 2.480E-12 |
| IFN-α protein (pg/mL) | IgE                            | 256 | 3.682E-01  | 1.219E-09 | 6.400E-09 |
| IFN-α protein (pg/mL) | Eotaxin-2                      | 256 | -2.313E-01 | 1.884E-04 | 6.214E-04 |
| IFN-α protein (pg/mL) | HDL in the H3P size range (μM) | 50  | -5.015E-01 | 2.072E-04 | 6.810E-04 |
| IFN-α protein (pg/mL) | CitH3-DNA                      | 185 | 2.318E-01  | 1.498E-03 | 4.357E-03 |
| IFN-α protein (pg/mL) | HDLC (mg/dL)                   | 50  | -3.666E-01 | 8.836E-03 | 2.034E-02 |
| IFN-α protein (pg/mL) | Apolipoprotein A1 (mg/dL)      | 50  | -3.254E-01 | 2.113E-02 | 4.426E-02 |
| IFN-α protein (pg/mL) | NE-DNA                         | 185 | 1.575E-01  | 3.231E-02 | 6.367E-02 |
| IFN-α protein (pg/mL) | Ferritin                       | 256 | 1.191E-01  | 5.704E-02 | 1.030E-01 |
| IFN-α protein (pg/mL) | CEC                            | 127 | -1.401E-01 | 1.162E-01 | 1.862E-01 |
| IFN-α protein (pg/mL) | cHDLP (μM)                     | 50  | -1.915E-01 | 1.828E-01 | 2.766E-01 |
| IFN-α protein (pg/mL) | IR                             | 106 | 9.313E-02  | 3.424E-01 | 4.487E-01 |
| IFN-α protein (pg/mL) | GlycA                          | 50  | -1.023E-01 | 4.795E-01 | 5.881E-01 |
| CitH3-DNA             | ANG2                           | 190 | 2.337E-01  | 1.176E-03 | 3.479E-03 |
| CitH3-DNA             | CEC                            | 123 | -2.850E-01 | 1.397E-03 | 4.104E-03 |
| CitH3-DNA             | BLC                            | 190 | 1.417E-01  | 5.108E-02 | 9.378E-02 |
| CitH3-DNA             | Apolipoprotein A1 (mg/dL)      | 48  | -2.362E-01 | 1.061E-01 | 1.742E-01 |
| CitH3-DNA             | cHDLP (μM)                     | 48  | -1.416E-01 | 3.372E-01 | 4.446E-01 |
| CitH3-DNA             | B2M                            | 189 | 5.637E-02  | 4.410E-01 | 5.480E-01 |
| CitH3-DNA             | BAFF                           | 190 | 5.095E-02  | 4.851E-01 | 5.916E-01 |
| MPO-DNA               | NE-DNA                         | 190 | 4.851E-01  | 1.319E-12 | 8.740E-12 |
| MPO-DNA               | CitH3-DNA                      | 190 | 4.002E-01  | 1.061E-08 | 5.130E-08 |

|               |                                      |     |            |           |           |
|---------------|--------------------------------------|-----|------------|-----------|-----------|
| MPO-DNA       | ITAC                                 | 190 | 2.412E-01  | 8.008E-04 | 2.433E-03 |
| MPO-DNA       | Eotaxin-2                            | 190 | -2.399E-01 | 8.579E-04 | 2.583E-03 |
| MPO-DNA       | ANG2                                 | 190 | 2.220E-01  | 2.078E-03 | 5.829E-03 |
| MPO-DNA       | CEC                                  | 123 | -2.613E-01 | 3.512E-03 | 9.214E-03 |
| MPO-DNA       | IL1RII                               | 190 | -2.107E-01 | 3.531E-03 | 9.214E-03 |
| MPO-DNA       | IgE                                  | 190 | 2.042E-01  | 4.718E-03 | 1.169E-02 |
| MPO-DNA       | Ficolin 3                            | 190 | 2.035E-01  | 4.868E-03 | 1.197E-02 |
| MPO-DNA       | IFN- $\alpha$ protein (pg/mL)        | 185 | 1.930E-01  | 8.482E-03 | 1.964E-02 |
| MPO-DNA       | MCP2                                 | 190 | 1.547E-01  | 3.304E-02 | 6.451E-02 |
| MPO-DNA       | BLC                                  | 190 | 1.422E-01  | 5.027E-02 | 9.268E-02 |
| MPO-DNA       | MIP3- $\beta$                        | 190 | 1.324E-01  | 6.853E-02 | 1.192E-01 |
| MPO-DNA       | GlycA                                | 48  | -2.278E-01 | 1.194E-01 | 1.907E-01 |
| MPO-DNA       | Lymphocyte count                     | 184 | -8.838E-02 | 2.329E-01 | 3.364E-01 |
| MPO-DNA       | IL-2                                 | 182 | 8.366E-02  | 2.615E-01 | 3.697E-01 |
| MPO-DNA       | Medium TRLP (nM)                     | 48  | 1.619E-01  | 2.715E-01 | 3.792E-01 |
| MPO-DNA       | BAFF                                 | 190 | 7.978E-02  | 2.739E-01 | 3.809E-01 |
| MPO-DNA       | HDL in the H3P size range ( $\mu$ M) | 48  | -1.499E-01 | 3.091E-01 | 4.165E-01 |
| MPO-DNA       | IP-10                                | 190 | 6.977E-02  | 3.388E-01 | 4.461E-01 |
| MPO-DNA       | Medium cHDLP ( $\mu$ M)              | 48  | -1.304E-01 | 3.768E-01 | 4.872E-01 |
| MPO-DNA       | B2M                                  | 189 | 6.253E-02  | 3.926E-01 | 5.031E-01 |
| MPO-DNA       | IR                                   | 76  | -7.167E-02 | 5.384E-01 | 6.350E-01 |
| MPO-DNA       | IFN- $\gamma$                        | 185 | 4.009E-02  | 5.880E-01 | 6.804E-01 |
| MPO-DNA       | HDLC (mg/dL)                         | 48  | -6.501E-02 | 6.606E-01 | 7.465E-01 |
| MPO-DNA       | Apolipoprotein A1 (mg/dL)            | 48  | -5.931E-02 | 6.888E-01 | 7.682E-01 |
| MPO-DNA       | IL-10                                | 183 | -2.567E-02 | 7.301E-01 | 8.028E-01 |
| MPO-DNA       | cHDLP ( $\mu$ M)                     | 48  | 4.773E-02  | 7.473E-01 | 8.145E-01 |
| MPO-DNA       | MCP1                                 | 190 | -2.208E-02 | 7.624E-01 | 8.236E-01 |
| MPO-DNA       | Ferritin                             | 190 | -3.934E-03 | 9.570E-01 | 9.671E-01 |
| MPO-DNA       | MPO-DNA                              | 190 | 1.000E+00  |           |           |
| NE-DNA        | CitH3-DNA                            | 190 | 7.106E-01  | <E-14     | <E-14     |
| NE-DNA        | Eotaxin-2                            | 190 | -2.071E-01 | 4.141E-03 | 1.052E-02 |
| NE-DNA        | ANG2                                 | 190 | 1.629E-01  | 2.470E-02 | 5.004E-02 |
| NE-DNA        | CEC                                  | 123 | -1.953E-01 | 3.042E-02 | 6.021E-02 |
| NE-DNA        | Ficolin 3                            | 190 | 1.315E-01  | 7.058E-02 | 1.220E-01 |
| NE-DNA        | BLC                                  | 190 | 1.090E-01  | 1.344E-01 | 2.093E-01 |
| NE-DNA        | HDL in the H3P size range ( $\mu$ M) | 48  | -1.457E-01 | 3.230E-01 | 4.305E-01 |
| NE-DNA        | B2M                                  | 189 | 5.800E-02  | 4.279E-01 | 5.339E-01 |
| NE-DNA        | BAFF                                 | 190 | 3.634E-02  | 6.187E-01 | 7.102E-01 |
| NE-DNA        | HDLC (mg/dL)                         | 48  | -7.077E-02 | 6.327E-01 | 7.234E-01 |
| NE-DNA        | Ferritin                             | 190 | -3.322E-02 | 6.491E-01 | 7.354E-01 |
| NE-DNA        | cHDLP ( $\mu$ M)                     | 48  | -4.062E-02 | 7.840E-01 | 8.427E-01 |
| NE-DNA        | Apolipoprotein A1 (mg/dL)            | 48  | -3.536E-02 | 8.114E-01 | 8.625E-01 |
| NE-DNA        | GlycA                                | 48  | 1.211E-02  | 9.349E-01 | 9.532E-01 |
| NE-DNA        | NE-DNA                               | 190 | 1.000E+00  |           |           |
| IL-10         | BLC                                  | 254 | 4.905E-01  | <E-14     | <E-14     |
| IL-10         | IFN- $\alpha$ protein (pg/mL)        | 254 | 5.486E-01  | <E-14     | <E-14     |
| IL-10         | B2M                                  | 253 | 5.959E-01  | <E-14     | <E-14     |
| IL-10         | IP-10                                | 254 | 6.689E-01  | <E-14     | <E-14     |
| IL-10         | ITAC                                 | 254 | 4.775E-01  | <E-14     | <E-14     |
| IL-10         | BAFF                                 | 254 | 4.620E-01  | <E-14     | 6.250E-14 |
| IL-10         | IFN- $\gamma$                        | 254 | 4.601E-01  | 1.021E-14 | 8.070E-14 |
| IL-10         | ANG2                                 | 254 | 4.558E-01  | 1.954E-14 | 1.490E-13 |
| IL-10         | Ficolin 3                            | 254 | 2.639E-01  | 2.029E-05 | 7.530E-05 |
| IL-10         | cHDLP ( $\mu$ M)                     | 50  | -4.470E-01 | 1.138E-03 | 3.377E-03 |
| IL-10         | IgE                                  | 254 | 1.902E-01  | 2.332E-03 | 6.437E-03 |
| IL-10         | IR                                   | 105 | 2.835E-01  | 3.386E-03 | 8.989E-03 |
| IL-10         | IL1RII                               | 254 | -1.817E-01 | 3.658E-03 | 9.482E-03 |
| IL-10         | GlycA                                | 50  | 3.746E-01  | 7.364E-03 | 1.737E-02 |
| IL-10         | Apolipoprotein A1 (mg/dL)            | 50  | -3.365E-01 | 1.689E-02 | 3.573E-02 |
| IL-10         | HDLC (mg/dL)                         | 50  | -3.220E-01 | 2.260E-02 | 4.712E-02 |
| IL-10         | Ferritin                             | 254 | 1.418E-01  | 2.385E-02 | 4.890E-02 |
| IL-10         | HDL in the H3P size range ( $\mu$ M) | 50  | -1.432E-01 | 3.211E-01 | 4.293E-01 |
| IL-10         | CitH3-DNA                            | 183 | 6.972E-02  | 3.484E-01 | 4.558E-01 |
| IL-10         | CEC                                  | 125 | -7.410E-02 | 4.115E-01 | 5.193E-01 |
| IL-10         | NE-DNA                               | 183 | 5.199E-02  | 4.846E-01 | 5.916E-01 |
| IL-10         | Eotaxin-2                            | 254 | -9.713E-03 | 8.776E-01 | 9.159E-01 |
| IL-10         | IL-10                                | 254 | 1.000E+00  |           |           |
| TNF- $\alpha$ | MCP1                                 | 254 | 4.939E-01  | <E-14     | <E-14     |
| TNF- $\alpha$ | ANG2                                 | 254 | 5.323E-01  | <E-14     | <E-14     |
| TNF- $\alpha$ | IFN- $\gamma$                        | 254 | 5.361E-01  | <E-14     | <E-14     |
| TNF- $\alpha$ | BAFF                                 | 254 | 5.682E-01  | <E-14     | <E-14     |
| TNF- $\alpha$ | Progranulin                          | 254 | 5.700E-01  | <E-14     | <E-14     |
| TNF- $\alpha$ | ITAC                                 | 254 | 5.831E-01  | <E-14     | <E-14     |

|                 |                                      |     |            |           |           |
|-----------------|--------------------------------------|-----|------------|-----------|-----------|
| TNF- $\alpha$   | MCP2                                 | 254 | 5.983E-01  | <E-14     | <E-14     |
| TNF- $\alpha$   | IFN- $\alpha$ protein (pg/mL)        | 254 | 6.172E-01  | <E-14     | <E-14     |
| TNF- $\alpha$   | IL-2                                 | 252 | 6.262E-01  | <E-14     | <E-14     |
| TNF- $\alpha$   | MIP3- $\beta$                        | 254 | 6.899E-01  | <E-14     | <E-14     |
| TNF- $\alpha$   | B2M                                  | 253 | 7.086E-01  | <E-14     | <E-14     |
| TNF- $\alpha$   | IP-10                                | 254 | 7.222E-01  | <E-14     | <E-14     |
| TNF- $\alpha$   | IL-10                                | 253 | 7.324E-01  | <E-14     | <E-14     |
| TNF- $\alpha$   | BLC                                  | 254 | 4.297E-01  | 7.807E-13 | 5.330E-12 |
| TNF- $\alpha$   | Lymphocyte count                     | 249 | -3.186E-01 | 2.800E-07 | 1.240E-06 |
| TNF- $\alpha$   | IL1RII                               | 254 | -2.957E-01 | 1.606E-06 | 6.780E-06 |
| TNF- $\alpha$   | IgE                                  | 254 | 2.355E-01  | 1.517E-04 | 5.162E-04 |
| TNF- $\alpha$   | Ficolin 3                            | 254 | 2.305E-01  | 2.112E-04 | 6.915E-04 |
| TNF- $\alpha$   | HDLC (mg/dL)                         | 50  | -4.609E-01 | 7.554E-04 | 2.306E-03 |
| TNF- $\alpha$   | Neutrophil number                    | 249 | -1.949E-01 | 2.008E-03 | 5.669E-03 |
| TNF- $\alpha$   | Apolipoprotein A1 (mg/dL)            | 50  | -4.184E-01 | 2.497E-03 | 6.826E-03 |
| TNF- $\alpha$   | cHDLP ( $\mu$ M)                     | 50  | -3.883E-01 | 5.331E-03 | 1.297E-02 |
| TNF- $\alpha$   | Medium cHDLP ( $\mu$ M)              | 50  | -3.416E-01 | 1.520E-02 | 3.246E-02 |
| TNF- $\alpha$   | HDL in the H3P size range ( $\mu$ M) | 50  | -3.398E-01 | 1.577E-02 | 3.352E-02 |
| TNF- $\alpha$   | Eotaxin-2                            | 254 | -1.383E-01 | 2.754E-02 | 5.489E-02 |
| TNF- $\alpha$   | CEC                                  | 126 | -1.962E-01 | 2.771E-02 | 5.510E-02 |
| TNF- $\alpha$   | Total cholesterol (mg/dL)            | 50  | -2.919E-01 | 3.971E-02 | 7.548E-02 |
| TNF- $\alpha$   | Ferritin                             | 254 | 1.202E-01  | 5.578E-02 | 1.011E-01 |
| TNF- $\alpha$   | CitH3-DNA                            | 183 | 1.185E-01  | 1.102E-01 | 1.777E-01 |
| TNF- $\alpha$   | NE-DNA                               | 183 | 1.039E-01  | 1.618E-01 | 2.483E-01 |
| TNF- $\alpha$   | MPO-DNA                              | 183 | 7.888E-02  | 2.885E-01 | 3.949E-01 |
| TNF- $\alpha$   | Medium TRLP (nM)                     | 50  | 1.407E-01  | 3.297E-01 | 4.367E-01 |
| TNF- $\alpha$   | IR                                   | 106 | 9.146E-02  | 3.511E-01 | 4.587E-01 |
| TNF- $\alpha$   | TRAILR3                              | 254 | -4.429E-02 | 4.822E-01 | 5.904E-01 |
| TNF- $\alpha$   | GlycA                                | 50  | 2.381E-02  | 8.696E-01 | 9.098E-01 |
| GlycA           | BAFF                                 | 50  | -2.471E-01 | 8.364E-02 | 1.415E-01 |
| GlycA           | Eotaxin-2                            | 50  | 2.409E-01  | 9.188E-02 | 1.536E-01 |
| GlycA           | BLC                                  | 50  | 1.916E-01  | 1.825E-01 | 2.766E-01 |
| GlycA           | CitH3-DNA                            | 48  | -1.288E-01 | 3.829E-01 | 4.928E-01 |
| GlycA           | cHDLP ( $\mu$ M)                     | 50  | -1.172E-01 | 4.178E-01 | 5.244E-01 |
| GlycA           | Apolipoprotein A1 (mg/dL)            | 50  | -8.643E-02 | 5.506E-01 | 6.459E-01 |
| GlycA           | B2M                                  | 49  | -8.382E-02 | 5.669E-01 | 6.605E-01 |
| GlycA           | Ficolin 3                            | 50  | 5.595E-02  | 6.996E-01 | 7.762E-01 |
| GlycA           | CEC                                  | 50  | -4.466E-02 | 7.581E-01 | 8.221E-01 |
| GlycA           | Ferritin                             | 50  | -3.667E-02 | 8.004E-01 | 8.549E-01 |
| GlycA           | ANG2                                 | 50  | -5.693E-03 | 9.687E-01 | 9.768E-01 |
| CEC             | Apolipoprotein A1 (mg/dL)            | 50  | 4.846E-01  | 3.625E-04 | 1.156E-03 |
| CEC             | BAFF                                 | 129 | -2.266E-01 | 9.824E-03 | 2.191E-02 |
| CEC             | ANG2                                 | 129 | -2.152E-01 | 1.430E-02 | 3.078E-02 |
| CEC             | B2M                                  | 128 | -1.862E-01 | 3.536E-02 | 6.827E-02 |
| CEC             | BLC                                  | 129 | -7.015E-02 | 4.296E-01 | 5.353E-01 |
| Leukocyte count | Lymphocyte count                     | 298 | 4.622E-01  | <E-14     | <E-14     |
| Leukocyte count | Neutrophil number                    | 297 | 9.381E-01  | <E-14     | <E-14     |
| Leukocyte count | Progranulin                          | 295 | -3.929E-01 | 2.513E-12 | 1.600E-11 |
| Leukocyte count | IFN- $\alpha$ protein (pg/mL)        | 251 | -4.146E-01 | 7.620E-12 | 4.790E-11 |
| Leukocyte count | IP-10                                | 295 | -3.479E-01 | 8.067E-10 | 4.290E-09 |
| Leukocyte count | TRAILR3                              | 295 | 3.464E-01  | 9.658E-10 | 5.100E-09 |
| Leukocyte count | MIP3- $\beta$                        | 295 | -3.322E-01 | 4.974E-09 | 2.490E-08 |
| Leukocyte count | MCP2                                 | 295 | -3.267E-01 | 9.195E-09 | 4.500E-08 |
| Leukocyte count | ITAC                                 | 295 | -3.098E-01 | 5.580E-08 | 2.600E-07 |
| Leukocyte count | IL1RII                               | 295 | 3.013E-01  | 1.316E-07 | 6.000E-07 |
| Leukocyte count | BAFF                                 | 295 | -3.012E-01 | 1.329E-07 | 6.020E-07 |
| Leukocyte count | B2M                                  | 294 | -2.911E-01 | 3.758E-07 | 1.660E-06 |
| Leukocyte count | VCAM1                                | 295 | -2.839E-01 | 7.107E-07 | 3.070E-06 |
| Leukocyte count | IL-2                                 | 248 | -2.950E-01 | 2.266E-06 | 9.430E-06 |
| Leukocyte count | Eotaxin-2                            | 295 | 2.683E-01  | 2.951E-06 | 1.210E-05 |
| Leukocyte count | TNF- $\alpha$                        | 249 | -2.859E-01 | 4.542E-06 | 1.820E-05 |
| Leukocyte count | IFN- $\gamma$                        | 251 | -2.552E-01 | 4.309E-05 | 1.539E-04 |
| Leukocyte count | ANG2                                 | 295 | -2.246E-01 | 9.960E-05 | 3.430E-04 |
| Leukocyte count | Total cholesterol (mg/dL)            | 50  | 4.890E-01  | 3.142E-04 | 1.009E-03 |
| Leukocyte count | Ficolin 3                            | 295 | -2.007E-01 | 5.239E-04 | 1.628E-03 |
| Leukocyte count | BLC                                  | 295 | -1.850E-01 | 1.414E-03 | 4.126E-03 |
| Leukocyte count | Very Large TRLP (nM)                 | 50  | 4.359E-01  | 1.555E-03 | 4.492E-03 |
| Leukocyte count | IgE                                  | 295 | -1.687E-01 | 3.667E-03 | 9.482E-03 |
| Leukocyte count | von Willebrand factor                | 294 | -1.540E-01 | 8.153E-03 | 1.908E-02 |
| Leukocyte count | MPO-DNA                              | 184 | -1.919E-01 | 9.053E-03 | 2.062E-02 |
| Leukocyte count | CitH3-DNA                            | 184 | -1.878E-01 | 1.067E-02 | 2.361E-02 |
| Leukocyte count | NE-DNA                               | 184 | -1.658E-01 | 2.452E-02 | 4.991E-02 |
| Leukocyte count | HDL in the H3P size range ( $\mu$ M) | 50  | 2.690E-01  | 5.889E-02 | 1.059E-01 |

|                       |                                |     |            |           |           |
|-----------------------|--------------------------------|-----|------------|-----------|-----------|
| Leukocyte count       | MCP1                           | 295 | -1.091E-01 | 6.127E-02 | 1.090E-01 |
| Leukocyte count       | cHDLP (µM)                     | 50  | 2.614E-01  | 6.668E-02 | 1.165E-01 |
| Leukocyte count       | Apolipoprotein A1 (mg/dL)      | 50  | 2.551E-01  | 7.375E-02 | 1.273E-01 |
| Leukocyte count       | IL-10                          | 249 | -1.129E-01 | 7.539E-02 | 1.293E-01 |
| Leukocyte count       | HDLC (mg/dL)                   | 50  | 2.363E-01  | 9.849E-02 | 1.634E-01 |
| Leukocyte count       | GlycA                          | 50  | 2.308E-01  | 1.068E-01 | 1.742E-01 |
| Leukocyte count       | Medium TRLP (nM)               | 50  | 2.219E-01  | 1.214E-01 | 1.922E-01 |
| Leukocyte count       | IR                             | 121 | 1.404E-01  | 1.245E-01 | 1.960E-01 |
| Leukocyte count       | CEC                            | 128 | 1.177E-01  | 1.857E-01 | 2.800E-01 |
| Leukocyte count       | Ferritin                       | 295 | -6.562E-02 | 2.612E-01 | 3.697E-01 |
| Leukocyte count       | Medium cHDLP (µM)              | 50  | 1.002E-01  | 4.885E-01 | 5.924E-01 |
| Leukocyte count       | Very Small TRLP (nM)           | 50  | 4.953E-02  | 7.327E-01 | 8.046E-01 |
| Leukocyte count       | Leukocyte count                | 298 | 1.000E+00  |           |           |
| von Willebrand factor | VCAM1                          | 302 | 5.206E-01  | <E-14     | <E-14     |
| von Willebrand factor | B2M                            | 302 | 4.025E-01  | 3.459E-13 | 2.480E-12 |
| von Willebrand factor | TNF-α                          | 253 | 4.268E-01  | 1.277E-12 | 8.590E-12 |
| von Willebrand factor | IP-10                          | 302 | 3.630E-01  | 7.752E-11 | 4.540E-10 |
| von Willebrand factor | IL-10                          | 253 | 3.939E-01  | 8.073E-11 | 4.700E-10 |
| von Willebrand factor | MCP2                           | 302 | 3.538E-01  | 2.486E-10 | 1.380E-09 |
| von Willebrand factor | Progranulin                    | 302 | 3.150E-01  | 2.204E-08 | 1.050E-07 |
| von Willebrand factor | IFN-α protein (pg/mL)          | 255 | 3.223E-01  | 1.417E-07 | 6.350E-07 |
| von Willebrand factor | BLC                            | 302 | 2.966E-01  | 1.513E-07 | 6.750E-07 |
| von Willebrand factor | Ferritin                       | 302 | 2.765E-01  | 1.056E-06 | 4.530E-06 |
| von Willebrand factor | ITAC                           | 302 | 2.719E-01  | 1.617E-06 | 6.790E-06 |
| von Willebrand factor | MIP3-β                         | 302 | 2.629E-01  | 3.641E-06 | 1.480E-05 |
| von Willebrand factor | BAFF                           | 302 | 2.602E-01  | 4.614E-06 | 1.840E-05 |
| von Willebrand factor | MCP1                           | 302 | 2.492E-01  | 1.176E-05 | 4.540E-05 |
| von Willebrand factor | Ficolin 3                      | 302 | 2.469E-01  | 1.418E-05 | 5.430E-05 |
| von Willebrand factor | ANG2                           | 302 | 2.452E-01  | 1.633E-05 | 6.200E-05 |
| von Willebrand factor | IL-2                           | 252 | 2.659E-01  | 1.887E-05 | 7.090E-05 |
| von Willebrand factor | Lymphocyte count               | 294 | -2.369E-01 | 4.087E-05 | 1.472E-04 |
| von Willebrand factor | IFN-γ                          | 255 | 1.861E-01  | 2.847E-03 | 7.685E-03 |
| von Willebrand factor | Very Small TRLP (nM)           | 49  | 2.319E-01  | 1.089E-01 | 1.762E-01 |
| von Willebrand factor | MPO-DNA                        | 189 | -1.021E-01 | 1.621E-01 | 2.483E-01 |
| von Willebrand factor | TRAILR3                        | 302 | -7.787E-02 | 1.771E-01 | 2.690E-01 |
| von Willebrand factor | cHDLP (µM)                     | 49  | -1.830E-01 | 2.082E-01 | 3.080E-01 |
| von Willebrand factor | Neutrophil number              | 294 | -7.097E-02 | 2.251E-01 | 3.268E-01 |
| von Willebrand factor | IL1RII                         | 302 | -6.234E-02 | 2.802E-01 | 3.860E-01 |
| von Willebrand factor | Very Large TRLP (nM)           | 49  | -1.508E-01 | 3.010E-01 | 4.100E-01 |
| von Willebrand factor | Eotaxin-2                      | 302 | 5.890E-02  | 3.076E-01 | 4.158E-01 |
| von Willebrand factor | CEC                            | 128 | 7.140E-02  | 4.232E-01 | 5.288E-01 |
| von Willebrand factor | GlycA                          | 49  | 6.935E-02  | 6.359E-01 | 7.242E-01 |
| von Willebrand factor | HDLC (mg/dL)                   | 49  | -6.381E-02 | 6.631E-01 | 7.476E-01 |
| von Willebrand factor | Medium TRLP (nM)               | 49  | 6.377E-02  | 6.634E-01 | 7.476E-01 |
| von Willebrand factor | Apolipoprotein A1 (mg/dL)      | 49  | -5.765E-02 | 6.940E-01 | 7.710E-01 |
| von Willebrand factor | Medium cHDLP (µM)              | 49  | -5.431E-02 | 7.109E-01 | 7.857E-01 |
| von Willebrand factor | NE-DNA                         | 189 | -2.424E-02 | 7.406E-01 | 8.092E-01 |
| von Willebrand factor | CitH3-DNA                      | 189 | -1.054E-02 | 8.856E-01 | 9.198E-01 |
| von Willebrand factor | IR                             | 118 | -1.245E-02 | 8.936E-01 | 9.269E-01 |
| von Willebrand factor | IgE                            | 302 | 7.378E-03  | 8.984E-01 | 9.308E-01 |
| von Willebrand factor | HDL in the H3P size range (µM) | 49  | -3.626E-03 | 9.803E-01 | 9.837E-01 |
| von Willebrand factor | Total cholesterol (mg/dL)      | 49  | 2.731E-03  | 9.851E-01 | 9.863E-01 |
| Very Small TRLP (nM)  | BAFF                           | 50  | 4.007E-01  | 3.932E-03 | 1.008E-02 |
| Very Small TRLP (nM)  | TNF-α                          | 50  | 3.671E-01  | 8.740E-03 | 2.017E-02 |
| Very Small TRLP (nM)  | B2M                            | 49  | 2.906E-01  | 4.284E-02 | 8.071E-02 |
| Very Small TRLP (nM)  | HDLC (mg/dL)                   | 50  | -2.730E-01 | 5.508E-02 | 1.003E-01 |
| Very Small TRLP (nM)  | VCAM1                          | 50  | 2.658E-01  | 6.207E-02 | 1.098E-01 |
| Very Small TRLP (nM)  | ANG2                           | 50  | 2.539E-01  | 7.515E-02 | 1.293E-01 |
| Very Small TRLP (nM)  | IL-10                          | 50  | 2.524E-01  | 7.700E-02 | 1.318E-01 |
| Very Small TRLP (nM)  | ITAC                           | 50  | 2.145E-01  | 1.347E-01 | 2.094E-01 |
| Very Small TRLP (nM)  | IFN-γ                          | 50  | 2.025E-01  | 1.585E-01 | 2.437E-01 |
| Very Small TRLP (nM)  | IL-2                           | 49  | 1.977E-01  | 1.732E-01 | 2.640E-01 |
| Very Small TRLP (nM)  | Apolipoprotein A1 (mg/dL)      | 50  | -1.912E-01 | 1.835E-01 | 2.772E-01 |
| Very Small TRLP (nM)  | MCP1                           | 50  | 1.870E-01  | 1.935E-01 | 2.892E-01 |
| Very Small TRLP (nM)  | MIP3-β                         | 50  | 1.853E-01  | 1.977E-01 | 2.950E-01 |
| Very Small TRLP (nM)  | cHDLP (µM)                     | 50  | -1.748E-01 | 2.246E-01 | 3.267E-01 |
| Very Small TRLP (nM)  | Ferritin                       | 50  | 1.582E-01  | 2.726E-01 | 3.798E-01 |
| Very Small TRLP (nM)  | Medium cHDLP (µM)              | 50  | -1.565E-01 | 2.779E-01 | 3.840E-01 |
| Very Small TRLP (nM)  | IFN-α protein (pg/mL)          | 50  | 1.488E-01  | 3.024E-01 | 4.113E-01 |
| Very Small TRLP (nM)  | HDL in the H3P size range (µM) | 50  | -1.452E-01 | 3.142E-01 | 4.214E-01 |
| Very Small TRLP (nM)  | Progranulin                    | 50  | 1.378E-01  | 3.399E-01 | 4.461E-01 |
| Very Small TRLP (nM)  | Ficolin 3                      | 50  | 1.267E-01  | 3.805E-01 | 4.904E-01 |
| Very Small TRLP (nM)  | IP-10                          | 50  | 1.187E-01  | 4.118E-01 | 5.193E-01 |

|                      |                                |     |            |           |           |
|----------------------|--------------------------------|-----|------------|-----------|-----------|
| Very Small TRLP (nM) | Medium TRLP (nM)               | 50  | 1.167E-01  | 4.197E-01 | 5.252E-01 |
| Very Small TRLP (nM) | MCP2                           | 50  | 1.128E-01  | 4.354E-01 | 5.417E-01 |
| Very Small TRLP (nM) | Total cholesterol (mg/dL)      | 50  | 1.087E-01  | 4.525E-01 | 5.598E-01 |
| Very Small TRLP (nM) | BLC                            | 50  | -1.003E-01 | 4.882E-01 | 5.924E-01 |
| Very Small TRLP (nM) | Eotaxin-2                      | 50  | -9.795E-02 | 4.986E-01 | 6.021E-01 |
| Very Small TRLP (nM) | Neutrophil number              | 50  | 8.363E-02  | 5.637E-01 | 6.576E-01 |
| Very Small TRLP (nM) | GlycA                          | 50  | 6.948E-02  | 6.316E-01 | 7.232E-01 |
| Very Small TRLP (nM) | Very Large TRLP (nM)           | 50  | 4.752E-02  | 7.431E-01 | 8.109E-01 |
| Very Small TRLP (nM) | CEC                            | 50  | -4.121E-02 | 7.763E-01 | 8.355E-01 |
| Very Small TRLP (nM) | IR                             | 34  | -4.482E-02 | 8.013E-01 | 8.549E-01 |
| Very Small TRLP (nM) | IgE                            | 50  | 2.850E-02  | 8.442E-01 | 8.923E-01 |
| Very Small TRLP (nM) | IL1RII                         | 50  | -2.209E-02 | 8.790E-01 | 9.162E-01 |
| Very Small TRLP (nM) | CitH3-DNA                      | 48  | 1.630E-02  | 9.124E-01 | 9.428E-01 |
| Very Small TRLP (nM) | MPO-DNA                        | 48  | -1.353E-02 | 9.273E-01 | 9.516E-01 |
| Very Small TRLP (nM) | Lymphocyte count               | 50  | -1.197E-02 | 9.342E-01 | 9.532E-01 |
| Very Small TRLP (nM) | TRAILR3                        | 50  | 1.005E-02  | 9.448E-01 | 9.578E-01 |
| Very Small TRLP (nM) | NE-DNA                         | 48  | 8.747E-03  | 9.529E-01 | 9.641E-01 |
| Very Small TRLP (nM) | Very Small TRLP (nM)           | 50  | 1.000E+00  |           |           |
| Very Large TRLP (nM) | cHDLP (µM)                     | 50  | 5.339E-01  | 6.517E-05 | 2.290E-04 |
| Very Large TRLP (nM) | Total cholesterol (mg/dL)      | 50  | 4.824E-01  | 3.887E-04 | 1.226E-03 |
| Very Large TRLP (nM) | Apolipoprotein A1 (mg/dL)      | 50  | 4.658E-01  | 6.531E-04 | 2.001E-03 |
| Very Large TRLP (nM) | Neutrophil number              | 50  | 4.022E-01  | 3.787E-03 | 9.733E-03 |
| Very Large TRLP (nM) | IR                             | 34  | 4.804E-01  | 4.034E-03 | 1.028E-02 |
| Very Large TRLP (nM) | HDL in the H3P size range (µM) | 50  | 3.810E-01  | 6.337E-03 | 1.516E-02 |
| Very Large TRLP (nM) | IL1RII                         | 50  | 3.657E-01  | 9.016E-03 | 2.062E-02 |
| Very Large TRLP (nM) | HDLC (mg/dL)                   | 50  | 3.622E-01  | 9.742E-03 | 2.179E-02 |
| Very Large TRLP (nM) | B2M                            | 49  | -3.228E-01 | 2.370E-02 | 4.883E-02 |
| Very Large TRLP (nM) | Medium cHDLP (µM)              | 50  | 2.976E-01  | 3.584E-02 | 6.903E-02 |
| Very Large TRLP (nM) | VCAM1                          | 50  | -2.815E-01 | 4.763E-02 | 8.857E-02 |
| Very Large TRLP (nM) | MIP3-β                         | 50  | -2.583E-01 | 7.015E-02 | 1.215E-01 |
| Very Large TRLP (nM) | Progranulin                    | 50  | -2.310E-01 | 1.065E-01 | 1.742E-01 |
| Very Large TRLP (nM) | CEC                            | 50  | 2.299E-01  | 1.082E-01 | 1.757E-01 |
| Very Large TRLP (nM) | TRAILR3                        | 50  | 2.219E-01  | 1.215E-01 | 1.922E-01 |
| Very Large TRLP (nM) | BAFF                           | 50  | -2.177E-01 | 1.289E-01 | 2.014E-01 |
| Very Large TRLP (nM) | Ferritin                       | 50  | -1.808E-01 | 2.089E-01 | 3.086E-01 |
| Very Large TRLP (nM) | IP-10                          | 50  | -1.792E-01 | 2.131E-01 | 3.136E-01 |
| Very Large TRLP (nM) | TNF-α                          | 50  | -1.785E-01 | 2.148E-01 | 3.151E-01 |
| Very Large TRLP (nM) | IL-10                          | 50  | -1.672E-01 | 2.458E-01 | 3.504E-01 |
| Very Large TRLP (nM) | Lymphocyte count               | 50  | 1.601E-01  | 2.668E-01 | 3.753E-01 |
| Very Large TRLP (nM) | ANG2                           | 50  | -1.569E-01 | 2.765E-01 | 3.840E-01 |
| Very Large TRLP (nM) | Medium TRLP (nM)               | 50  | 1.474E-01  | 3.070E-01 | 4.158E-01 |
| Very Large TRLP (nM) | IgE                            | 50  | 1.409E-01  | 3.289E-01 | 4.367E-01 |
| Very Large TRLP (nM) | MCP1                           | 50  | 1.173E-01  | 4.172E-01 | 5.244E-01 |
| Very Large TRLP (nM) | Eotaxin-2                      | 50  | 1.033E-01  | 4.754E-01 | 5.847E-01 |
| Very Large TRLP (nM) | IFN-α protein (pg/mL)          | 50  | -9.687E-02 | 5.033E-01 | 6.061E-01 |
| Very Large TRLP (nM) | IL-2                           | 49  | -9.369E-02 | 5.220E-01 | 6.224E-01 |
| Very Large TRLP (nM) | GlycA                          | 50  | 7.964E-02  | 5.825E-01 | 6.750E-01 |
| Very Large TRLP (nM) | IFN-γ                          | 50  | -6.757E-02 | 6.411E-01 | 7.272E-01 |
| Very Large TRLP (nM) | NE-DNA                         | 48  | -6.026E-02 | 6.841E-01 | 7.640E-01 |
| Very Large TRLP (nM) | Ficolin 3                      | 50  | 4.509E-02  | 7.559E-01 | 8.207E-01 |
| Very Large TRLP (nM) | MPO-DNA                        | 48  | -4.480E-02 | 7.624E-01 | 8.236E-01 |
| Very Large TRLP (nM) | CitH3-DNA                      | 48  | -4.015E-02 | 7.864E-01 | 8.440E-01 |
| Very Large TRLP (nM) | MCP2                           | 50  | 3.532E-02  | 8.076E-01 | 8.595E-01 |
| Very Large TRLP (nM) | ITAC                           | 50  | -2.831E-02 | 8.453E-01 | 8.923E-01 |
| Very Large TRLP (nM) | BLC                            | 50  | -4.225E-03 | 9.768E-01 | 9.813E-01 |
| VCAM1                | BLC                            | 303 | 4.577E-01  | <E-14     | <E-14     |
| VCAM1                | MCP2                           | 303 | 4.590E-01  | <E-14     | <E-14     |
| VCAM1                | ANG2                           | 303 | 4.630E-01  | <E-14     | <E-14     |
| VCAM1                | ITAC                           | 303 | 4.671E-01  | <E-14     | <E-14     |
| VCAM1                | BAFF                           | 303 | 4.683E-01  | <E-14     | <E-14     |
| VCAM1                | IFN-α protein (pg/mL)          | 256 | 4.946E-01  | <E-14     | <E-14     |
| VCAM1                | Progranulin                    | 303 | 5.128E-01  | <E-14     | <E-14     |
| VCAM1                | MIP3-β                         | 303 | 5.304E-01  | <E-14     | <E-14     |
| VCAM1                | IP-10                          | 303 | 5.431E-01  | <E-14     | <E-14     |
| VCAM1                | B2M                            | 302 | 6.078E-01  | <E-14     | <E-14     |
| VCAM1                | IL-10                          | 254 | 6.128E-01  | <E-14     | <E-14     |
| VCAM1                | TNF-α                          | 254 | 6.843E-01  | <E-14     | <E-14     |
| VCAM1                | IL-2                           | 253 | 4.359E-01  | 3.733E-13 | 2.610E-12 |
| VCAM1                | IFN-γ                          | 256 | 4.032E-01  | 2.005E-11 | 1.220E-10 |
| VCAM1                | Lymphocyte count               | 295 | -3.609E-01 | 1.673E-10 | 9.670E-10 |
| VCAM1                | MCP1                           | 303 | 3.017E-01  | 8.544E-08 | 3.910E-07 |
| VCAM1                | Ficolin 3                      | 303 | 2.429E-01  | 1.908E-05 | 7.140E-05 |
| VCAM1                | Neutrophil number              | 295 | -1.686E-01 | 3.678E-03 | 9.482E-03 |

|                           |                                |     |            |           |           |
|---------------------------|--------------------------------|-----|------------|-----------|-----------|
| VCAM1                     | Ferritin                       | 303 | 1.626E-01  | 4.546E-03 | 1.135E-02 |
| VCAM1                     | IL1RII                         | 303 | -1.537E-01 | 7.353E-03 | 1.737E-02 |
| VCAM1                     | cHDLP (µM)                     | 50  | -3.522E-01 | 1.214E-02 | 2.646E-02 |
| VCAM1                     | HDLC (mg/dL)                   | 50  | -3.293E-01 | 1.954E-02 | 4.124E-02 |
| VCAM1                     | Total cholesterol (mg/dL)      | 50  | -3.216E-01 | 2.278E-02 | 4.738E-02 |
| VCAM1                     | IgE                            | 303 | 1.191E-01  | 3.832E-02 | 7.316E-02 |
| VCAM1                     | Apolipoprotein A1 (mg/dL)      | 50  | -2.925E-01 | 3.930E-02 | 7.486E-02 |
| VCAM1                     | Medium cHDLP (µM)              | 50  | -2.834E-01 | 4.610E-02 | 8.621E-02 |
| VCAM1                     | HDL in the H3P size range (µM) | 50  | -2.630E-01 | 6.496E-02 | 1.141E-01 |
| VCAM1                     | CEC                            | 129 | -1.350E-01 | 1.271E-01 | 1.990E-01 |
| VCAM1                     | CitH3-DNA                      | 190 | 7.692E-02  | 2.915E-01 | 3.978E-01 |
| VCAM1                     | IR                             | 119 | 6.989E-02  | 4.501E-01 | 5.576E-01 |
| VCAM1                     | NE-DNA                         | 190 | 5.172E-02  | 4.785E-01 | 5.877E-01 |
| VCAM1                     | MPO-DNA                        | 190 | 4.944E-02  | 4.981E-01 | 6.021E-01 |
| VCAM1                     | GlycA                          | 50  | 8.964E-02  | 5.359E-01 | 6.338E-01 |
| VCAM1                     | Medium TRLP (nM)               | 50  | 6.984E-02  | 6.299E-01 | 7.221E-01 |
| VCAM1                     | TRAILR3                        | 303 | -9.001E-03 | 8.760E-01 | 9.153E-01 |
| VCAM1                     | Eotaxin-2                      | 303 | -4.492E-03 | 9.379E-01 | 9.546E-01 |
| VCAM1                     | VCAM1                          | 303 | 1.000E+00  |           |           |
| TRAILR3                   | Neutrophil number              | 295 | 3.352E-01  | 3.548E-09 | 1.810E-08 |
| TRAILR3                   | IL1RII                         | 303 | 2.255E-01  | 7.508E-05 | 2.617E-04 |
| TRAILR3                   | Eotaxin-2                      | 303 | 2.132E-01  | 1.842E-04 | 6.100E-04 |
| TRAILR3                   | IFN-α protein (pg/mL)          | 256 | -2.157E-01 | 5.114E-04 | 1.601E-03 |
| TRAILR3                   | Ficolin 3                      | 303 | -1.487E-01 | 9.516E-03 | 2.150E-02 |
| TRAILR3                   | IFN-γ                          | 256 | -1.421E-01 | 2.298E-02 | 4.767E-02 |
| TRAILR3                   | Lymphocyte count               | 295 | 1.265E-01  | 2.990E-02 | 5.932E-02 |
| TRAILR3                   | Progranulin                    | 303 | -1.214E-01 | 3.467E-02 | 6.707E-02 |
| TRAILR3                   | IL-2                           | 253 | -1.191E-01 | 5.863E-02 | 1.056E-01 |
| TRAILR3                   | GlycA                          | 50  | 2.419E-01  | 9.060E-02 | 1.518E-01 |
| TRAILR3                   | B2M                            | 302 | 9.448E-02  | 1.013E-01 | 1.670E-01 |
| TRAILR3                   | BLC                            | 303 | -8.897E-02 | 1.223E-01 | 1.931E-01 |
| TRAILR3                   | ANG2                           | 303 | 7.157E-02  | 2.141E-01 | 3.146E-01 |
| TRAILR3                   | CitH3-DNA                      | 190 | -8.013E-02 | 2.718E-01 | 3.792E-01 |
| TRAILR3                   | IgE                            | 303 | 5.921E-02  | 3.043E-01 | 4.132E-01 |
| TRAILR3                   | HDL in the H3P size range (µM) | 50  | 1.431E-01  | 3.216E-01 | 4.294E-01 |
| TRAILR3                   | IP-10                          | 303 | -5.618E-02 | 3.297E-01 | 4.367E-01 |
| TRAILR3                   | Total cholesterol (mg/dL)      | 50  | 1.273E-01  | 3.785E-01 | 4.885E-01 |
| TRAILR3                   | MCP1                           | 303 | -3.887E-02 | 5.002E-01 | 6.032E-01 |
| TRAILR3                   | MPO-DNA                        | 190 | -4.874E-02 | 5.043E-01 | 6.064E-01 |
| TRAILR3                   | IL-10                          | 254 | -4.103E-02 | 5.151E-01 | 6.160E-01 |
| TRAILR3                   | BAFF                           | 303 | 2.927E-02  | 6.119E-01 | 7.043E-01 |
| TRAILR3                   | NE-DNA                         | 190 | -2.970E-02 | 6.842E-01 | 7.640E-01 |
| TRAILR3                   | Apolipoprotein A1 (mg/dL)      | 50  | 5.749E-02  | 6.917E-01 | 7.704E-01 |
| TRAILR3                   | MCP2                           | 303 | -1.811E-02 | 7.536E-01 | 8.193E-01 |
| TRAILR3                   | Medium TRLP (nM)               | 50  | 4.206E-02  | 7.718E-01 | 8.327E-01 |
| TRAILR3                   | Ferritin                       | 303 | 1.469E-02  | 7.989E-01 | 8.545E-01 |
| TRAILR3                   | HDLC (mg/dL)                   | 50  | 3.195E-02  | 8.257E-01 | 8.755E-01 |
| TRAILR3                   | CEC                            | 129 | -1.520E-02 | 8.643E-01 | 9.075E-01 |
| TRAILR3                   | MIP3-β                         | 303 | 6.143E-03  | 9.152E-01 | 9.437E-01 |
| TRAILR3                   | ITAC                           | 303 | -5.800E-03 | 9.199E-01 | 9.463E-01 |
| TRAILR3                   | cHDLP (µM)                     | 50  | 1.247E-02  | 9.315E-01 | 9.532E-01 |
| TRAILR3                   | IR                             | 119 | 2.967E-03  | 9.745E-01 | 9.812E-01 |
| TRAILR3                   | Medium cHDLP (µM)              | 50  | 2.763E-03  | 9.848E-01 | 9.863E-01 |
| TRAILR3                   | TRAILR3                        | 303 | 1.000E+00  |           |           |
| Total cholesterol (mg/dL) | cHDLP (µM)                     | 50  | 5.077E-01  | 1.677E-04 | 5.664E-04 |
| Total cholesterol (mg/dL) | Apolipoprotein A1 (mg/dL)      | 50  | 4.963E-01  | 2.465E-04 | 7.980E-04 |
| Total cholesterol (mg/dL) | HDLC (mg/dL)                   | 50  | 4.702E-01  | 5.707E-04 | 1.761E-03 |
| Total cholesterol (mg/dL) | HDL in the H3P size range (µM) | 50  | 4.684E-01  | 6.029E-04 | 1.854E-03 |
| Total cholesterol (mg/dL) | Lymphocyte count               | 50  | 4.218E-01  | 2.282E-03 | 6.318E-03 |
| Total cholesterol (mg/dL) | Progranulin                    | 50  | -4.123E-01 | 2.930E-03 | 7.882E-03 |
| Total cholesterol (mg/dL) | BAFF                           | 50  | -3.965E-01 | 4.359E-03 | 1.094E-02 |
| Total cholesterol (mg/dL) | Neutrophil number              | 50  | 3.935E-01  | 4.698E-03 | 1.169E-02 |
| Total cholesterol (mg/dL) | IFN-α protein (pg/mL)          | 50  | -3.878E-01 | 5.386E-03 | 1.306E-02 |
| Total cholesterol (mg/dL) | IL-2                           | 49  | -3.860E-01 | 6.162E-03 | 1.482E-02 |
| Total cholesterol (mg/dL) | Medium cHDLP (µM)              | 50  | 3.648E-01  | 9.205E-03 | 2.091E-02 |
| Total cholesterol (mg/dL) | MCP2                           | 50  | -3.415E-01 | 1.523E-02 | 3.246E-02 |
| Total cholesterol (mg/dL) | IL1RII                         | 50  | 3.180E-01  | 2.444E-02 | 4.986E-02 |
| Total cholesterol (mg/dL) | Eotaxin-2                      | 50  | 3.141E-01  | 2.633E-02 | 5.293E-02 |
| Total cholesterol (mg/dL) | GlycA                          | 50  | 2.994E-01  | 3.465E-02 | 6.707E-02 |
| Total cholesterol (mg/dL) | MIP3-β                         | 50  | -2.466E-01 | 8.424E-02 | 1.422E-01 |
| Total cholesterol (mg/dL) | B2M                            | 49  | -2.379E-01 | 9.976E-02 | 1.649E-01 |
| Total cholesterol (mg/dL) | Medium TRLP (nM)               | 50  | 2.355E-01  | 9.974E-02 | 1.649E-01 |
| Total cholesterol (mg/dL) | IP-10                          | 50  | -2.308E-01 | 1.068E-01 | 1.742E-01 |

|                           |                                |     |            |           |           |
|---------------------------|--------------------------------|-----|------------|-----------|-----------|
| Total cholesterol (mg/dL) | CEC                            | 50  | 2.301E-01  | 1.079E-01 | 1.756E-01 |
| Total cholesterol (mg/dL) | IFN-γ                          | 50  | -2.230E-01 | 1.196E-01 | 1.907E-01 |
| Total cholesterol (mg/dL) | ANG2                           | 50  | -2.079E-01 | 1.473E-01 | 2.282E-01 |
| Total cholesterol (mg/dL) | IR                             | 34  | 2.310E-01  | 1.888E-01 | 2.841E-01 |
| Total cholesterol (mg/dL) | CitH3-DNA                      | 48  | -1.927E-01 | 1.894E-01 | 2.846E-01 |
| Total cholesterol (mg/dL) | IL-10                          | 50  | -1.379E-01 | 3.396E-01 | 4.461E-01 |
| Total cholesterol (mg/dL) | ITAC                           | 50  | -1.231E-01 | 3.946E-01 | 5.040E-01 |
| Total cholesterol (mg/dL) | BLC                            | 50  | -8.912E-02 | 5.382E-01 | 6.350E-01 |
| Total cholesterol (mg/dL) | MCP1                           | 50  | -5.384E-02 | 7.104E-01 | 7.857E-01 |
| Total cholesterol (mg/dL) | MPO-DNA                        | 48  | 4.278E-02  | 7.728E-01 | 8.328E-01 |
| Total cholesterol (mg/dL) | IgE                            | 50  | -3.330E-02 | 8.184E-01 | 8.689E-01 |
| Total cholesterol (mg/dL) | NE-DNA                         | 48  | 2.443E-02  | 8.691E-01 | 9.098E-01 |
| Total cholesterol (mg/dL) | Ficolin 3                      | 50  | 1.089E-02  | 9.402E-01 | 9.546E-01 |
| Total cholesterol (mg/dL) | Ferritin                       | 50  | -5.668E-03 | 9.688E-01 | 9.768E-01 |
| Progranulin               | ANG2                           | 303 | 4.719E-01  | <E-14     | <E-14     |
| Progranulin               | IL-2                           | 253 | 4.918E-01  | <E-14     | <E-14     |
| Progranulin               | BAFF                           | 303 | 4.956E-01  | <E-14     | <E-14     |
| Progranulin               | IL-10                          | 254 | 5.378E-01  | <E-14     | <E-14     |
| Progranulin               | ITAC                           | 303 | 5.448E-01  | <E-14     | <E-14     |
| Progranulin               | B2M                            | 302 | 5.482E-01  | <E-14     | <E-14     |
| Progranulin               | MCP2                           | 303 | 5.713E-01  | <E-14     | <E-14     |
| Progranulin               | IP-10                          | 303 | 5.936E-01  | <E-14     | <E-14     |
| Progranulin               | IFN-α protein (pg/mL)          | 256 | 6.208E-01  | <E-14     | <E-14     |
| Progranulin               | MIP3-β                         | 303 | 6.291E-01  | <E-14     | <E-14     |
| Progranulin               | IFN-γ                          | 256 | 4.835E-01  | <E-14     | <E-14     |
| Progranulin               | Ficolin 3                      | 303 | 3.686E-01  | 3.478E-11 | 2.070E-10 |
| Progranulin               | BLC                            | 303 | 3.667E-01  | 4.454E-11 | 2.630E-10 |
| Progranulin               | MCP1                           | 303 | 3.440E-01  | 7.635E-10 | 4.080E-09 |
| Progranulin               | Lymphocyte count               | 295 | -3.199E-01 | 1.925E-08 | 9.260E-08 |
| Progranulin               | Neutrophil number              | 295 | -3.155E-01 | 3.047E-08 | 1.450E-07 |
| Progranulin               | IgE                            | 303 | 3.101E-01  | 3.537E-08 | 1.660E-07 |
| Progranulin               | IL1RII                         | 303 | -2.270E-01 | 6.701E-05 | 2.345E-04 |
| Progranulin               | Ferritin                       | 303 | 1.983E-01  | 5.173E-04 | 1.614E-03 |
| Progranulin               | HDL in the H3P size range (μM) | 50  | -4.356E-01 | 1.568E-03 | 4.514E-03 |
| Progranulin               | Eotaxin-2                      | 303 | -1.556E-01 | 6.650E-03 | 1.582E-02 |
| Progranulin               | MPO-DNA                        | 190 | 1.629E-01  | 2.469E-02 | 5.004E-02 |
| Progranulin               | CitH3-DNA                      | 190 | 1.611E-01  | 2.643E-02 | 5.293E-02 |
| Progranulin               | NE-DNA                         | 190 | 1.557E-01  | 3.197E-02 | 6.313E-02 |
| Progranulin               | Apolipoprotein A1 (mg/dL)      | 50  | -2.833E-01 | 4.616E-02 | 8.621E-02 |
| Progranulin               | HDLC (mg/dL)                   | 50  | -2.673E-01 | 6.054E-02 | 1.079E-01 |
| Progranulin               | cHDLP (μM)                     | 50  | -2.393E-01 | 9.424E-02 | 1.572E-01 |
| Progranulin               | Medium cHDLP (μM)              | 50  | -1.945E-01 | 1.760E-01 | 2.677E-01 |
| Progranulin               | GlycA                          | 50  | -9.944E-02 | 4.920E-01 | 5.958E-01 |
| Progranulin               | Medium TRLP (nM)               | 50  | -9.632E-02 | 5.058E-01 | 6.074E-01 |
| Progranulin               | CEC                            | 129 | -5.719E-02 | 5.197E-01 | 6.206E-01 |
| Progranulin               | IR                             | 119 | 1.759E-02  | 8.494E-01 | 8.940E-01 |
| Progranulin               | Progranulin                    | 303 | 1.000E+00  |           |           |
| Neutrophil number         | Eotaxin-2                      | 295 | 2.804E-01  | 9.877E-07 | 4.250E-06 |
| Neutrophil number         | IFN-α protein (pg/mL)          | 251 | -2.941E-01 | 2.128E-06 | 8.890E-06 |
| Neutrophil number         | IL1RII                         | 295 | 2.573E-01  | 7.603E-06 | 2.980E-05 |
| Neutrophil number         | MIP3-β                         | 295 | -2.519E-01 | 1.195E-05 | 4.590E-05 |
| Neutrophil number         | IP-10                          | 295 | -2.321E-01 | 5.716E-05 | 2.017E-04 |
| Neutrophil number         | MCP2                           | 295 | -2.251E-01 | 9.639E-05 | 3.346E-04 |
| Neutrophil number         | ITAC                           | 295 | -2.249E-01 | 9.733E-05 | 3.366E-04 |
| Neutrophil number         | IL-2                           | 248 | -2.310E-01 | 2.440E-04 | 7.928E-04 |
| Neutrophil number         | B2M                            | 294 | -1.893E-01 | 1.108E-03 | 3.301E-03 |
| Neutrophil number         | BAFF                           | 295 | -1.792E-01 | 2.001E-03 | 5.666E-03 |
| Neutrophil number         | IFN-γ                          | 251 | -1.898E-01 | 2.538E-03 | 6.917E-03 |
| Neutrophil number         | Lymphocyte count               | 297 | 1.691E-01  | 3.472E-03 | 9.170E-03 |
| Neutrophil number         | CitH3-DNA                      | 184 | -1.937E-01 | 8.431E-03 | 1.962E-02 |
| Neutrophil number         | MPO-DNA                        | 184 | -1.908E-01 | 9.493E-03 | 2.150E-02 |
| Neutrophil number         | NE-DNA                         | 184 | -1.886E-01 | 1.037E-02 | 2.301E-02 |
| Neutrophil number         | GlycA                          | 50  | 3.519E-01  | 1.220E-02 | 2.652E-02 |
| Neutrophil number         | ANG2                           | 295 | -1.428E-01 | 1.410E-02 | 3.043E-02 |
| Neutrophil number         | Ficolin 3                      | 295 | -1.320E-01 | 2.337E-02 | 4.825E-02 |
| Neutrophil number         | IgE                            | 295 | -1.316E-01 | 2.384E-02 | 4.890E-02 |
| Neutrophil number         | IR                             | 121 | 1.623E-01  | 7.538E-02 | 1.293E-01 |
| Neutrophil number         | Medium TRLP (nM)               | 50  | 2.169E-01  | 1.302E-01 | 2.031E-01 |
| Neutrophil number         | CEC                            | 128 | 1.076E-01  | 2.266E-01 | 3.285E-01 |
| Neutrophil number         | HDL in the H3P size range (μM) | 50  | 1.689E-01  | 2.408E-01 | 3.456E-01 |
| Neutrophil number         | Apolipoprotein A1 (mg/dL)      | 50  | 1.591E-01  | 2.698E-01 | 3.784E-01 |
| Neutrophil number         | cHDLP (μM)                     | 50  | 1.586E-01  | 2.712E-01 | 3.792E-01 |
| Neutrophil number         | HDLC (mg/dL)                   | 50  | 1.330E-01  | 3.572E-01 | 4.639E-01 |



|                   |                                |     |            |           |           |
|-------------------|--------------------------------|-----|------------|-----------|-----------|
| Neutrophil number | BLC                            | 295 | -4.842E-02 | 4.074E-01 | 5.158E-01 |
| Neutrophil number | MCP1                           | 295 | -4.377E-02 | 4.539E-01 | 5.607E-01 |
| Neutrophil number | Ferritin                       | 295 | -3.650E-02 | 5.323E-01 | 6.323E-01 |
| Neutrophil number | IL-10                          | 249 | 3.693E-02  | 5.619E-01 | 6.567E-01 |
| Neutrophil number | Medium cHDLP (µM)              | 50  | 1.581E-02  | 9.132E-01 | 9.428E-01 |
| MCP2              | IFN-γ                          | 256 | 4.875E-01  | <E-14     | <E-14     |
| MCP2              | IL-2                           | 253 | 5.008E-01  | <E-14     | <E-14     |
| MCP2              | ANG2                           | 303 | 5.069E-01  | <E-14     | <E-14     |
| MCP2              | IL-10                          | 254 | 5.161E-01  | <E-14     | <E-14     |
| MCP2              | MCP1                           | 303 | 5.330E-01  | <E-14     | <E-14     |
| MCP2              | BAFF                           | 303 | 5.652E-01  | <E-14     | <E-14     |
| MCP2              | B2M                            | 302 | 5.932E-01  | <E-14     | <E-14     |
| MCP2              | ITAC                           | 303 | 6.108E-01  | <E-14     | <E-14     |
| MCP2              | IFN-α protein (pg/mL)          | 256 | 6.514E-01  | <E-14     | <E-14     |
| MCP2              | MIP3-β                         | 303 | 6.585E-01  | <E-14     | <E-14     |
| MCP2              | IP-10                          | 303 | 7.476E-01  | <E-14     | <E-14     |
| MCP2              | Ficolin 3                      | 303 | 3.905E-01  | 1.770E-12 | 1.140E-11 |
| MCP2              | IgE                            | 303 | 3.747E-01  | 1.559E-11 | 9.660E-11 |
| MCP2              | BLC                            | 303 | 3.735E-01  | 1.827E-11 | 1.120E-10 |
| MCP2              | Lymphocyte count               | 295 | -3.601E-01 | 1.847E-10 | 1.060E-09 |
| MCP2              | Ferritin                       | 303 | 2.150E-01  | 1.628E-04 | 5.518E-04 |
| MCP2              | HDLC (mg/dL)                   | 50  | -4.950E-01 | 2.581E-04 | 8.322E-04 |
| MCP2              | CitH3-DNA                      | 190 | 2.550E-01  | 3.841E-04 | 1.220E-03 |
| MCP2              | Apolipoprotein A1 (mg/dL)      | 50  | -4.482E-01 | 1.097E-03 | 3.279E-03 |
| MCP2              | cHDLP (µM)                     | 50  | -4.361E-01 | 1.546E-03 | 4.481E-03 |
| MCP2              | IL1RII                         | 303 | -1.564E-01 | 6.383E-03 | 1.522E-02 |
| MCP2              | Eotaxin-2                      | 303 | -1.485E-01 | 9.617E-03 | 2.168E-02 |
| MCP2              | NE-DNA                         | 190 | 1.873E-01  | 9.677E-03 | 2.171E-02 |
| MCP2              | HDL in the H3P size range (µM) | 50  | -2.729E-01 | 5.522E-02 | 1.003E-01 |
| MCP2              | CEC                            | 129 | -1.516E-01 | 8.634E-02 | 1.455E-01 |
| MCP2              | Medium cHDLP (µM)              | 50  | -2.309E-01 | 1.067E-01 | 1.742E-01 |
| MCP2              | GlycA                          | 50  | -1.175E-01 | 4.163E-01 | 5.240E-01 |
| MCP2              | IR                             | 119 | 5.233E-02  | 5.719E-01 | 6.654E-01 |
| MCP2              | Medium TRLP (nM)               | 50  | -6.501E-02 | 6.538E-01 | 7.397E-01 |
| MCP1              | IP-10                          | 303 | 4.637E-01  | <E-14     | <E-14     |
| MCP1              | B2M                            | 302 | 3.934E-01  | 1.289E-12 | 8.600E-12 |
| MCP1              | IL-10                          | 254 | 4.245E-01  | 1.556E-12 | 1.010E-11 |
| MCP1              | MIP3-β                         | 303 | 3.534E-01  | 2.429E-10 | 1.360E-09 |
| MCP1              | IL-2                           | 253 | 3.792E-01  | 4.492E-10 | 2.460E-09 |
| MCP1              | IFN-α protein (pg/mL)          | 256 | 3.726E-01  | 7.481E-10 | 4.030E-09 |
| MCP1              | IFN-γ                          | 256 | 3.664E-01  | 1.489E-09 | 7.730E-09 |
| MCP1              | BAFF                           | 303 | 3.243E-01  | 7.541E-09 | 3.710E-08 |
| MCP1              | ANG2                           | 303 | 3.025E-01  | 7.907E-08 | 3.660E-07 |
| MCP1              | ITAC                           | 303 | 2.651E-01  | 2.871E-06 | 1.180E-05 |
| MCP1              | BLC                            | 303 | 2.427E-01  | 1.938E-05 | 7.220E-05 |
| MCP1              | Ficolin 3                      | 303 | 2.332E-01  | 4.154E-05 | 1.490E-04 |
| MCP1              | Lymphocyte count               | 295 | -1.536E-01 | 8.230E-03 | 1.920E-02 |
| MCP1              | Ferritin                       | 303 | 1.501E-01  | 8.886E-03 | 2.040E-02 |
| MCP1              | HDLC (mg/dL)                   | 50  | -3.205E-01 | 2.327E-02 | 4.816E-02 |
| MCP1              | Medium cHDLP (µM)              | 50  | -3.150E-01 | 2.589E-02 | 5.220E-02 |
| MCP1              | Eotaxin-2                      | 303 | 1.140E-01  | 4.734E-02 | 8.822E-02 |
| MCP1              | Apolipoprotein A1 (mg/dL)      | 50  | -2.803E-01 | 4.866E-02 | 9.030E-02 |
| MCP1              | CEC                            | 129 | -1.645E-01 | 6.242E-02 | 1.101E-01 |
| MCP1              | IgE                            | 303 | 1.046E-01  | 6.906E-02 | 1.199E-01 |
| MCP1              | cHDLP (µM)                     | 50  | -2.487E-01 | 8.159E-02 | 1.388E-01 |
| MCP1              | HDL in the H3P size range (µM) | 50  | -2.280E-01 | 1.113E-01 | 1.791E-01 |
| MCP1              | IL1RII                         | 303 | -6.735E-02 | 2.425E-01 | 3.474E-01 |
| MCP1              | Medium TRLP (nM)               | 50  | 1.613E-01  | 2.630E-01 | 3.713E-01 |
| MCP1              | GlycA                          | 50  | 9.456E-02  | 5.136E-01 | 6.151E-01 |
| MCP1              | IR                             | 119 | 5.596E-02  | 5.456E-01 | 6.417E-01 |
| MCP1              | NE-DNA                         | 190 | -3.739E-02 | 6.085E-01 | 7.023E-01 |
| MCP1              | CitH3-DNA                      | 190 | -2.308E-02 | 7.519E-01 | 8.184E-01 |
| MCP1              | MCP1                           | 303 | 1.000E+00  |           |           |
| Medium TRLP (nM)  | IgE                            | 50  | -3.493E-01 | 1.291E-02 | 2.801E-02 |
| Medium TRLP (nM)  | IL-2                           | 49  | -3.520E-01 | 1.314E-02 | 2.842E-02 |
| Medium TRLP (nM)  | CitH3-DNA                      | 48  | -2.429E-01 | 9.616E-02 | 1.601E-01 |
| Medium TRLP (nM)  | IR                             | 34  | -2.714E-01 | 1.205E-01 | 1.915E-01 |
| Medium TRLP (nM)  | Eotaxin-2                      | 50  | 2.089E-01  | 1.455E-01 | 2.257E-01 |
| Medium TRLP (nM)  | Medium cHDLP (µM)              | 50  | -1.813E-01 | 2.078E-01 | 3.079E-01 |
| Medium TRLP (nM)  | ANG2                           | 50  | -1.566E-01 | 2.774E-01 | 3.840E-01 |
| Medium TRLP (nM)  | NE-DNA                         | 48  | -1.486E-01 | 3.133E-01 | 4.213E-01 |
| Medium TRLP (nM)  | GlycA                          | 50  | 1.397E-01  | 3.333E-01 | 4.402E-01 |
| Medium TRLP (nM)  | Lymphocyte count               | 50  | 1.297E-01  | 3.692E-01 | 4.788E-01 |



|                   |                                |     |            |           |           |
|-------------------|--------------------------------|-----|------------|-----------|-----------|
| Medium TRLP (nM)  | Ficolin 3                      | 50  | 1.288E-01  | 3.728E-01 | 4.826E-01 |
| Medium TRLP (nM)  | cHDLP (µM)                     | 50  | 1.224E-01  | 3.972E-01 | 5.063E-01 |
| Medium TRLP (nM)  | MIP3-β                         | 50  | 1.221E-01  | 3.983E-01 | 5.066E-01 |
| Medium TRLP (nM)  | ITAC                           | 50  | 1.111E-01  | 4.424E-01 | 5.489E-01 |
| Medium TRLP (nM)  | B2M                            | 49  | 9.137E-02  | 5.324E-01 | 6.323E-01 |
| Medium TRLP (nM)  | IP-10                          | 50  | -8.998E-02 | 5.343E-01 | 6.331E-01 |
| Medium TRLP (nM)  | IL1RII                         | 50  | 8.504E-02  | 5.571E-01 | 6.526E-01 |
| Medium TRLP (nM)  | Ferritin                       | 50  | 7.971E-02  | 5.821E-01 | 6.750E-01 |
| Medium TRLP (nM)  | IFN-α protein (pg/mL)          | 50  | 6.873E-02  | 6.353E-01 | 7.242E-01 |
| Medium TRLP (nM)  | IFN-γ                          | 50  | -6.767E-02 | 6.406E-01 | 7.272E-01 |
| Medium TRLP (nM)  | IL-10                          | 50  | 6.156E-02  | 6.711E-01 | 7.553E-01 |
| Medium TRLP (nM)  | BAFF                           | 50  | -6.133E-02 | 6.722E-01 | 7.556E-01 |
| Medium TRLP (nM)  | BLC                            | 50  | -2.805E-02 | 8.467E-01 | 8.923E-01 |
| Medium TRLP (nM)  | HDL in the H3P size range (µM) | 50  | -2.119E-02 | 8.839E-01 | 9.198E-01 |
| Medium TRLP (nM)  | CEC                            | 50  | 1.369E-02  | 9.248E-01 | 9.502E-01 |
| Medium TRLP (nM)  | Apolipoprotein A1 (mg/dL)      | 50  | 1.175E-02  | 9.354E-01 | 9.532E-01 |
| Medium TRLP (nM)  | HDLC (mg/dL)                   | 50  | -9.902E-03 | 9.456E-01 | 9.578E-01 |
| Medium cHDLP (µM) | HDL in the H3P size range (µM) | 50  | 8.236E-01  | 2.078E-13 | 1.500E-12 |
| Medium cHDLP (µM) | Apolipoprotein A1 (mg/dL)      | 50  | 6.058E-01  | 3.142E-06 | 1.280E-05 |
| Medium cHDLP (µM) | HDLC (mg/dL)                   | 50  | 6.015E-01  | 3.844E-06 | 1.550E-05 |
| Medium cHDLP (µM) | cHDLP (µM)                     | 50  | 5.537E-01  | 3.028E-05 | 1.100E-04 |
| Medium cHDLP (µM) | CEC                            | 50  | 4.757E-01  | 4.799E-04 | 1.508E-03 |
| Medium cHDLP (µM) | BAFF                           | 50  | -4.589E-01 | 8.027E-04 | 2.433E-03 |
| Medium cHDLP (µM) | IFN-α protein (pg/mL)          | 50  | -3.430E-01 | 1.476E-02 | 3.162E-02 |
| Medium cHDLP (µM) | MIP3-β                         | 50  | -2.951E-01 | 3.745E-02 | 7.166E-02 |
| Medium cHDLP (µM) | B2M                            | 49  | -2.710E-01 | 5.967E-02 | 1.068E-01 |
| Medium cHDLP (µM) | IP-10                          | 50  | -2.498E-01 | 8.018E-02 | 1.370E-01 |
| Medium cHDLP (µM) | Ficolin 3                      | 50  | 2.200E-01  | 1.248E-01 | 1.961E-01 |
| Medium cHDLP (µM) | ANG2                           | 50  | -2.034E-01 | 1.566E-01 | 2.412E-01 |
| Medium cHDLP (µM) | GlycA                          | 50  | 1.780E-01  | 2.163E-01 | 3.168E-01 |
| Medium cHDLP (µM) | IL-10                          | 50  | -1.757E-01 | 2.223E-01 | 3.240E-01 |
| Medium cHDLP (µM) | IL1RII                         | 50  | 1.757E-01  | 2.224E-01 | 3.240E-01 |
| Medium cHDLP (µM) | BLC                            | 50  | -1.565E-01 | 2.777E-01 | 3.840E-01 |
| Medium cHDLP (µM) | IR                             | 34  | 1.797E-01  | 3.091E-01 | 4.165E-01 |
| Medium cHDLP (µM) | IL-2                           | 49  | -1.454E-01 | 3.189E-01 | 4.270E-01 |
| Medium cHDLP (µM) | IgE                            | 50  | 1.331E-01  | 3.567E-01 | 4.639E-01 |
| Medium cHDLP (µM) | CitH3-DNA                      | 48  | -1.284E-01 | 3.843E-01 | 4.939E-01 |
| Medium cHDLP (µM) | Lymphocyte count               | 50  | 1.186E-01  | 4.119E-01 | 5.193E-01 |
| Medium cHDLP (µM) | ITAC                           | 50  | -6.896E-02 | 6.342E-01 | 7.242E-01 |
| Medium cHDLP (µM) | Ferritin                       | 50  | -6.845E-02 | 6.367E-01 | 7.242E-01 |
| Medium cHDLP (µM) | NE-DNA                         | 48  | -5.431E-02 | 7.139E-01 | 7.880E-01 |
| Medium cHDLP (µM) | IFN-γ                          | 50  | -4.443E-02 | 7.593E-01 | 8.224E-01 |
| Medium cHDLP (µM) | Eotaxin-2                      | 50  | 1.196E-02  | 9.343E-01 | 9.532E-01 |
| Medium cHDLP (µM) | Medium cHDLP (µM)              | 50  | 1.000E+00  |           |           |
| MIP3-β            | ANG2                           | 303 | 5.214E-01  | <E-14     | <E-14     |
| MIP3-β            | IL-10                          | 254 | 5.853E-01  | <E-14     | <E-14     |
| MIP3-β            | BAFF                           | 303 | 5.928E-01  | <E-14     | <E-14     |
| MIP3-β            | IFN-α protein (pg/mL)          | 256 | 6.010E-01  | <E-14     | <E-14     |
| MIP3-β            | B2M                            | 302 | 6.184E-01  | <E-14     | <E-14     |
| MIP3-β            | ITAC                           | 303 | 6.191E-01  | <E-14     | <E-14     |
| MIP3-β            | IP-10                          | 303 | 6.658E-01  | <E-14     | <E-14     |
| MIP3-β            | IL-2                           | 253 | 4.819E-01  | <E-14     | <E-14     |
| MIP3-β            | IFN-γ                          | 256 | 4.451E-01  | 7.327E-14 | 5.440E-13 |
| MIP3-β            | BLC                            | 303 | 4.016E-01  | 3.568E-13 | 2.520E-12 |
| MIP3-β            | Ficolin 3                      | 303 | 3.552E-01  | 1.946E-10 | 1.100E-09 |
| MIP3-β            | Lymphocyte count               | 295 | -3.136E-01 | 3.746E-08 | 1.750E-07 |
| MIP3-β            | IgE                            | 303 | 2.971E-01  | 1.363E-07 | 6.140E-07 |
| MIP3-β            | IL1RII                         | 303 | -2.385E-01 | 2.723E-05 | 9.940E-05 |
| MIP3-β            | HDLC (mg/dL)                   | 50  | -4.251E-01 | 2.091E-03 | 5.846E-03 |
| MIP3-β            | cHDLP (µM)                     | 50  | -4.119E-01 | 2.956E-03 | 7.928E-03 |
| MIP3-β            | Ferritin                       | 303 | 1.678E-01  | 3.393E-03 | 8.989E-03 |
| MIP3-β            | HDL in the H3P size range (µM) | 50  | -4.049E-01 | 3.534E-03 | 9.214E-03 |
| MIP3-β            | Apolipoprotein A1 (mg/dL)      | 50  | -3.964E-01 | 4.376E-03 | 1.095E-02 |
| MIP3-β            | NE-DNA                         | 190 | 1.427E-01  | 4.953E-02 | 9.151E-02 |
| MIP3-β            | CEC                            | 129 | -1.706E-01 | 5.322E-02 | 9.728E-02 |
| MIP3-β            | CitH3-DNA                      | 190 | 1.265E-01  | 8.194E-02 | 1.391E-01 |
| MIP3-β            | Eotaxin-2                      | 303 | -6.681E-02 | 2.463E-01 | 3.505E-01 |
| MIP3-β            | GlycA                          | 50  | -8.395E-02 | 5.622E-01 | 6.567E-01 |
| MIP3-β            | IR                             | 119 | 1.557E-02  | 8.665E-01 | 9.087E-01 |
| Lymphocyte count  | IFN-α protein (pg/mL)          | 251 | -4.754E-01 | <E-14     | 1.090E-14 |
| Lymphocyte count  | BLC                            | 295 | -4.307E-01 | <E-14     | 7.430E-14 |
| Lymphocyte count  | IL-10                          | 249 | -4.603E-01 | 1.821E-14 | 1.400E-13 |
| Lymphocyte count  | BAFF                           | 295 | -4.210E-01 | 4.219E-14 | 3.160E-13 |

|                  |                                      |     |            |           |           |
|------------------|--------------------------------------|-----|------------|-----------|-----------|
| Lymphocyte count | IP-10                                | 295 | -3.986E-01 | 1.119E-12 | 7.580E-12 |
| Lymphocyte count | B2M                                  | 294 | -3.443E-01 | 1.327E-09 | 6.920E-09 |
| Lymphocyte count | ITAC                                 | 295 | -3.145E-01 | 3.397E-08 | 1.610E-07 |
| Lymphocyte count | Ficolin 3                            | 295 | -2.691E-01 | 2.740E-06 | 1.130E-05 |
| Lymphocyte count | IFN- $\gamma$                        | 251 | -2.796E-01 | 6.865E-06 | 2.710E-05 |
| Lymphocyte count | IL-2                                 | 248 | -2.809E-01 | 7.062E-06 | 2.780E-05 |
| Lymphocyte count | ANG2                                 | 295 | -2.470E-01 | 1.781E-05 | 6.730E-05 |
| Lymphocyte count | IL1RII                               | 295 | 1.855E-01  | 1.373E-03 | 4.050E-03 |
| Lymphocyte count | IgE                                  | 295 | -1.472E-01 | 1.136E-02 | 2.508E-02 |
| Lymphocyte count | cHDLP ( $\mu$ M)                     | 50  | 2.227E-01  | 1.200E-01 | 1.910E-01 |
| Lymphocyte count | HDL in the H3P size range ( $\mu$ M) | 50  | 1.872E-01  | 1.929E-01 | 2.888E-01 |
| Lymphocyte count | GlycA                                | 50  | -1.777E-01 | 2.169E-01 | 3.171E-01 |
| Lymphocyte count | HDLC (mg/dL)                         | 50  | 1.731E-01  | 2.292E-01 | 3.317E-01 |
| Lymphocyte count | Ferritin                             | 295 | -6.942E-02 | 2.345E-01 | 3.382E-01 |
| Lymphocyte count | Apolipoprotein A1 (mg/dL)            | 50  | 1.691E-01  | 2.405E-01 | 3.456E-01 |
| Lymphocyte count | IR                                   | 121 | -1.066E-01 | 2.444E-01 | 3.496E-01 |
| Lymphocyte count | Eotaxin-2                            | 295 | 6.683E-02  | 2.525E-01 | 3.582E-01 |
| Lymphocyte count | CitH3-DNA                            | 184 | -4.686E-02 | 5.276E-01 | 6.283E-01 |
| Lymphocyte count | CEC                                  | 128 | 2.956E-02  | 7.405E-01 | 8.092E-01 |
| Lymphocyte count | NE-DNA                               | 184 | -1.583E-02 | 8.311E-01 | 8.802E-01 |
| Lymphocyte count | Lymphocyte count                     | 298 | 1.000E+00  |           |           |
| IL-2             | B2M                                  | 252 | 4.884E-01  | <E-14     | <E-14     |
| IL-2             | IL-10                                | 253 | 5.185E-01  | <E-14     | <E-14     |
| IL-2             | IP-10                                | 253 | 5.577E-01  | <E-14     | <E-14     |
| IL-2             | IFN- $\gamma$                        | 253 | 5.654E-01  | <E-14     | <E-14     |
| IL-2             | ITAC                                 | 253 | 4.813E-01  | <E-14     | <E-14     |
| IL-2             | IFN- $\alpha$ protein (pg/mL)        | 253 | 4.314E-01  | 6.892E-13 | 4.750E-12 |
| IL-2             | BAFF                                 | 253 | 4.199E-01  | 3.149E-12 | 1.990E-11 |
| IL-2             | BLC                                  | 253 | 3.806E-01  | 3.810E-10 | 2.100E-09 |
| IL-2             | ANG2                                 | 253 | 3.604E-01  | 3.561E-09 | 1.810E-08 |
| IL-2             | IL1RII                               | 253 | -2.335E-01 | 1.786E-04 | 5.961E-04 |
| IL-2             | Eotaxin-2                            | 253 | -1.965E-01 | 1.685E-03 | 4.804E-03 |
| IL-2             | Ficolin 3                            | 253 | 1.805E-01  | 3.979E-03 | 1.017E-02 |
| IL-2             | IgE                                  | 253 | 1.672E-01  | 7.706E-03 | 1.813E-02 |
| IL-2             | CitH3-DNA                            | 182 | 1.868E-01  | 1.155E-02 | 2.544E-02 |
| IL-2             | IR                                   | 105 | 2.441E-01  | 1.209E-02 | 2.643E-02 |
| IL-2             | cHDLP ( $\mu$ M)                     | 49  | -3.035E-01 | 3.404E-02 | 6.616E-02 |
| IL-2             | CEC                                  | 124 | -1.827E-01 | 4.228E-02 | 7.984E-02 |
| IL-2             | HDL in the H3P size range ( $\mu$ M) | 49  | -2.791E-01 | 5.211E-02 | 9.547E-02 |
| IL-2             | Apolipoprotein A1 (mg/dL)            | 49  | -2.760E-01 | 5.495E-02 | 1.002E-01 |
| IL-2             | NE-DNA                               | 182 | 1.396E-01  | 6.018E-02 | 1.075E-01 |
| IL-2             | HDLC (mg/dL)                         | 49  | -2.685E-01 | 6.208E-02 | 1.098E-01 |
| IL-2             | GlycA                                | 49  | -1.351E-01 | 3.547E-01 | 4.620E-01 |
| IL-2             | Ferritin                             | 253 | 9.104E-03  | 8.854E-01 | 9.198E-01 |
| IL1RII           | IFN- $\alpha$ protein (pg/mL)        | 256 | -3.571E-01 | 4.077E-09 | 2.050E-08 |
| IL1RII           | Eotaxin-2                            | 303 | 2.414E-01  | 2.152E-05 | 7.950E-05 |
| IL1RII           | IP-10                                | 303 | -2.352E-01 | 3.535E-05 | 1.279E-04 |
| IL1RII           | IFN- $\gamma$                        | 256 | -1.961E-01 | 1.613E-03 | 4.631E-03 |
| IL1RII           | ITAC                                 | 303 | -1.767E-01 | 2.019E-03 | 5.680E-03 |
| IL1RII           | CEC                                  | 129 | 2.448E-01  | 5.176E-03 | 1.263E-02 |
| IL1RII           | BAFF                                 | 303 | -1.585E-01 | 5.687E-03 | 1.376E-02 |
| IL1RII           | HDL in the H3P size range ( $\mu$ M) | 50  | 3.764E-01  | 7.052E-03 | 1.673E-02 |
| IL1RII           | NE-DNA                               | 190 | -1.921E-01 | 7.920E-03 | 1.858E-02 |
| IL1RII           | CitH3-DNA                            | 190 | -1.823E-01 | 1.183E-02 | 2.598E-02 |
| IL1RII           | ANG2                                 | 303 | -1.443E-01 | 1.192E-02 | 2.611E-02 |
| IL1RII           | Apolipoprotein A1 (mg/dL)            | 50  | 3.022E-01  | 3.293E-02 | 6.444E-02 |
| IL1RII           | cHDLP ( $\mu$ M)                     | 50  | 2.955E-01  | 3.724E-02 | 7.141E-02 |
| IL1RII           | IR                                   | 119 | 1.708E-01  | 6.334E-02 | 1.115E-01 |
| IL1RII           | HDLC (mg/dL)                         | 50  | 2.496E-01  | 8.050E-02 | 1.372E-01 |
| IL1RII           | BLC                                  | 303 | -9.741E-02 | 9.054E-02 | 1.518E-01 |
| IL1RII           | B2M                                  | 302 | -8.861E-02 | 1.244E-01 | 1.960E-01 |
| IL1RII           | Ficolin 3                            | 303 | -7.378E-02 | 2.003E-01 | 2.984E-01 |
| IL1RII           | GlycA                                | 50  | 1.562E-01  | 2.786E-01 | 3.844E-01 |
| IL1RII           | IgE                                  | 303 | -5.886E-02 | 3.071E-01 | 4.158E-01 |
| IL1RII           | Ferritin                             | 303 | 4.362E-03  | 9.397E-01 | 9.546E-01 |
| ITAC             | IgE                                  | 303 | 4.832E-01  | <E-14     | <E-14     |
| ITAC             | BAFF                                 | 303 | 5.209E-01  | <E-14     | <E-14     |
| ITAC             | ANG2                                 | 303 | 5.710E-01  | <E-14     | <E-14     |
| ITAC             | B2M                                  | 302 | 5.804E-01  | <E-14     | <E-14     |
| ITAC             | IFN- $\alpha$ protein (pg/mL)        | 256 | 5.922E-01  | <E-14     | <E-14     |
| ITAC             | IP-10                                | 303 | 7.055E-01  | <E-14     | <E-14     |
| ITAC             | IFN- $\gamma$                        | 256 | 4.568E-01  | 1.332E-14 | 1.030E-13 |
| ITAC             | BLC                                  | 303 | 4.116E-01  | 8.127E-14 | 5.980E-13 |

|       |                                |     |            |           |           |
|-------|--------------------------------|-----|------------|-----------|-----------|
| ITAC  | Ficolin 3                      | 303 | 3.447E-01  | 7.015E-10 | 3.800E-09 |
| ITAC  | CitH3-DNA                      | 190 | 2.747E-01  | 1.255E-04 | 4.304E-04 |
| ITAC  | Eotaxin-2                      | 303 | -1.670E-01 | 3.542E-03 | 9.214E-03 |
| ITAC  | NE-DNA                         | 190 | 1.980E-01  | 6.187E-03 | 1.484E-02 |
| ITAC  | CEC                            | 129 | -1.955E-01 | 2.641E-02 | 5.293E-02 |
| ITAC  | HDLC (mg/dL)                   | 50  | -2.682E-01 | 5.966E-02 | 1.068E-01 |
| ITAC  | Apolipoprotein A1 (mg/dL)      | 50  | -2.293E-01 | 1.093E-01 | 1.765E-01 |
| ITAC  | cHDLP (µM)                     | 50  | -2.197E-01 | 1.253E-01 | 1.965E-01 |
| ITAC  | Ferritin                       | 303 | 7.916E-02  | 1.693E-01 | 2.590E-01 |
| ITAC  | HDL in the H3P size range (µM) | 50  | -1.401E-01 | 3.317E-01 | 4.387E-01 |
| ITAC  | GlycA                          | 50  | 8.993E-02  | 5.346E-01 | 6.331E-01 |
| ITAC  | IR                             | 119 | 3.070E-02  | 7.403E-01 | 8.092E-01 |
| ITAC  | ITAC                           | 303 | 1.000E+00  |           |           |
| IFN-γ | IP-10                          | 256 | 5.626E-01  | <E-14     | <E-14     |
| IFN-γ | IFN-α protein (pg/mL)          | 256 | 4.224E-01  | 1.673E-12 | 1.080E-11 |
| IFN-γ | B2M                            | 255 | 4.020E-01  | 2.538E-11 | 1.530E-10 |
| IFN-γ | BAFF                           | 256 | 3.274E-01  | 8.275E-08 | 3.810E-07 |
| IFN-γ | BLC                            | 256 | 2.991E-01  | 1.093E-06 | 4.660E-06 |
| IFN-γ | ANG2                           | 256 | 2.518E-01  | 4.600E-05 | 1.637E-04 |
| IFN-γ | Eotaxin-2                      | 256 | -2.323E-01 | 1.763E-04 | 5.906E-04 |
| IFN-γ | IgE                            | 256 | 2.142E-01  | 5.599E-04 | 1.734E-03 |
| IFN-γ | Ficolin 3                      | 256 | 1.891E-01  | 2.377E-03 | 6.538E-03 |
| IFN-γ | CitH3-DNA                      | 185 | 1.898E-01  | 9.682E-03 | 2.171E-02 |
| IFN-γ | NE-DNA                         | 185 | 1.686E-01  | 2.179E-02 | 4.555E-02 |
| IFN-γ | cHDLP (µM)                     | 50  | -2.872E-01 | 4.318E-02 | 8.118E-02 |
| IFN-γ | Apolipoprotein A1 (mg/dL)      | 50  | -1.545E-01 | 2.840E-01 | 3.900E-01 |
| IFN-γ | Ferritin                       | 256 | 6.190E-02  | 3.239E-01 | 4.310E-01 |
| IFN-γ | IR                             | 106 | 8.302E-02  | 3.975E-01 | 5.063E-01 |
| IFN-γ | HDLC (mg/dL)                   | 50  | -1.218E-01 | 3.994E-01 | 5.072E-01 |
| IFN-γ | HDL in the H3P size range (µM) | 50  | -8.834E-02 | 5.418E-01 | 6.382E-01 |
| IFN-γ | CEC                            | 127 | -3.366E-02 | 7.072E-01 | 7.836E-01 |
| IFN-γ | GlycA                          | 50  | -3.757E-02 | 7.956E-01 | 8.520E-01 |
| IP-10 | BLC                            | 303 | 4.661E-01  | <E-14     | <E-14     |
| IP-10 | ANG2                           | 303 | 5.811E-01  | <E-14     | <E-14     |
| IP-10 | BAFF                           | 303 | 5.878E-01  | <E-14     | <E-14     |
| IP-10 | B2M                            | 302 | 6.266E-01  | <E-14     | <E-14     |
| IP-10 | IFN-α protein (pg/mL)          | 256 | 6.268E-01  | <E-14     | <E-14     |
| IP-10 | IgE                            | 303 | 3.997E-01  | 4.712E-13 | 3.270E-12 |
| IP-10 | Ficolin 3                      | 303 | 2.824E-01  | 5.792E-07 | 2.520E-06 |
| IP-10 | cHDLP (µM)                     | 50  | -5.577E-01 | 2.583E-05 | 9.470E-05 |
| IP-10 | Apolipoprotein A1 (mg/dL)      | 50  | -5.112E-01 | 1.482E-04 | 5.065E-04 |
| IP-10 | HDLC (mg/dL)                   | 50  | -4.995E-01 | 2.218E-04 | 7.235E-04 |
| IP-10 | Eotaxin-2                      | 303 | -1.738E-01 | 2.392E-03 | 6.558E-03 |
| IP-10 | Ferritin                       | 303 | 1.613E-01  | 4.880E-03 | 1.197E-02 |
| IP-10 | NE-DNA                         | 190 | 1.749E-01  | 1.582E-02 | 3.355E-02 |
| IP-10 | CEC                            | 129 | -1.983E-01 | 2.430E-02 | 4.969E-02 |
| IP-10 | CitH3-DNA                      | 190 | 1.548E-01  | 3.293E-02 | 6.444E-02 |
| IP-10 | HDL in the H3P size range (µM) | 50  | -2.960E-01 | 3.688E-02 | 7.088E-02 |
| IP-10 | IR                             | 119 | 1.093E-01  | 2.368E-01 | 3.409E-01 |
| IP-10 | GlycA                          | 50  | 1.071E-01  | 4.589E-01 | 5.661E-01 |
| IP-10 | IP-10                          | 303 | 1.000E+00  |           |           |
| IgE   | ANG2                           | 303 | 4.074E-01  | 1.519E-13 | 1.110E-12 |
| IgE   | B2M                            | 302 | 3.694E-01  | 3.363E-11 | 2.010E-10 |
| IgE   | BAFF                           | 303 | 2.567E-01  | 6.027E-06 | 2.390E-05 |
| IgE   | Ficolin 3                      | 303 | 2.448E-01  | 1.631E-05 | 6.200E-05 |
| IgE   | NE-DNA                         | 190 | 2.301E-01  | 1.402E-03 | 4.105E-03 |
| IgE   | Eotaxin-2                      | 303 | -1.640E-01 | 4.213E-03 | 1.064E-02 |
| IgE   | CitH3-DNA                      | 190 | 2.037E-01  | 4.824E-03 | 1.190E-02 |
| IgE   | BLC                            | 303 | 1.404E-01  | 1.447E-02 | 3.107E-02 |
| IgE   | CEC                            | 129 | -2.038E-01 | 2.053E-02 | 4.311E-02 |
| IgE   | Ferritin                       | 303 | 6.664E-02  | 2.475E-01 | 3.517E-01 |
| IgE   | IR                             | 119 | 4.844E-02  | 6.009E-01 | 6.945E-01 |
| IgE   | cHDLP (µM)                     | 50  | -7.381E-02 | 6.105E-01 | 7.036E-01 |
| IgE   | GlycA                          | 50  | 5.030E-02  | 7.287E-01 | 8.023E-01 |
| IgE   | HDL in the H3P size range (µM) | 50  | -1.629E-02 | 9.106E-01 | 9.424E-01 |
| IgE   | Apolipoprotein A1 (mg/dL)      | 50  | -1.282E-02 | 9.296E-01 | 9.528E-01 |
| IgE   | HDLC (mg/dL)                   | 50  | 4.455E-03  | 9.755E-01 | 9.812E-01 |
| IgE   | IgE                            | 303 | 1.000E+00  |           |           |
| IR    | Ficolin 3                      | 119 | 1.697E-01  | 6.506E-02 | 1.141E-01 |
| IR    | CEC                            | 79  | -2.083E-01 | 6.547E-02 | 1.146E-01 |
| IR    | Eotaxin-2                      | 119 | -1.478E-01 | 1.086E-01 | 1.761E-01 |
| IR    | GlycA                          | 34  | 2.727E-01  | 1.187E-01 | 1.900E-01 |
| IR    | HDL in the H3P size range (µM) | 34  | 2.242E-01  | 2.024E-01 | 3.009E-01 |

|                                |                                |     |            |           |           |
|--------------------------------|--------------------------------|-----|------------|-----------|-----------|
| IR                             | BLC                            | 119 | 9.916E-02  | 2.833E-01 | 3.896E-01 |
| IR                             | Apolipoprotein A1 (mg/dL)      | 34  | 1.643E-01  | 3.531E-01 | 4.607E-01 |
| IR                             | Ferritin                       | 119 | -7.918E-02 | 3.920E-01 | 5.030E-01 |
| IR                             | CitH3-DNA                      | 76  | 9.392E-02  | 4.196E-01 | 5.252E-01 |
| IR                             | BAFF                           | 119 | -6.795E-02 | 4.628E-01 | 5.700E-01 |
| IR                             | cHDLP (µM)                     | 34  | 1.246E-01  | 4.828E-01 | 5.904E-01 |
| IR                             | NE-DNA                         | 76  | 5.870E-02  | 6.145E-01 | 7.064E-01 |
| IR                             | ANG2                           | 119 | -3.768E-02 | 6.841E-01 | 7.640E-01 |
| IR                             | B2M                            | 118 | 3.278E-02  | 7.245E-01 | 7.987E-01 |
| IR                             | HDLC (mg/dL)                   | 34  | 4.339E-02  | 8.075E-01 | 8.595E-01 |
| HDLC (mg/dL)                   | Apolipoprotein A1 (mg/dL)      | 50  | 9.651E-01  | <E-14     | <E-14     |
| HDLC (mg/dL)                   | cHDLP (µM)                     | 50  | 8.071E-01  | 1.456E-12 | 9.570E-12 |
| HDLC (mg/dL)                   | HDL in the H3P size range (µM) | 50  | 5.788E-01  | 1.068E-05 | 4.140E-05 |
| HDLC (mg/dL)                   | CEC                            | 50  | 5.073E-01  | 1.698E-04 | 5.709E-04 |
| HDLC (mg/dL)                   | ANG2                           | 50  | -4.289E-01 | 1.883E-03 | 5.352E-03 |
| HDLC (mg/dL)                   | BAFF                           | 50  | -4.156E-01 | 2.690E-03 | 7.284E-03 |
| HDLC (mg/dL)                   | Eotaxin-2                      | 50  | 3.156E-01  | 2.559E-02 | 5.172E-02 |
| HDLC (mg/dL)                   | Ferritin                       | 50  | -2.910E-01 | 4.032E-02 | 7.647E-02 |
| HDLC (mg/dL)                   | CitH3-DNA                      | 48  | -2.856E-01 | 4.907E-02 | 9.086E-02 |
| HDLC (mg/dL)                   | BLC                            | 50  | -2.325E-01 | 1.042E-01 | 1.715E-01 |
| HDLC (mg/dL)                   | B2M                            | 49  | -1.470E-01 | 3.136E-01 | 4.213E-01 |
| HDLC (mg/dL)                   | GlycA                          | 50  | -8.003E-02 | 5.806E-01 | 6.746E-01 |
| HDLC (mg/dL)                   | Ficolin 3                      | 50  | -5.727E-02 | 6.928E-01 | 7.707E-01 |
| HDL in the H3P size range (µM) | Apolipoprotein A1 (mg/dL)      | 50  | 6.216E-01  | 1.450E-06 | 6.150E-06 |
| HDL in the H3P size range (µM) | cHDLP (µM)                     | 50  | 5.397E-01  | 5.240E-05 | 1.857E-04 |
| HDL in the H3P size range (µM) | BAFF                           | 50  | -4.888E-01 | 3.158E-04 | 1.011E-03 |
| HDL in the H3P size range (µM) | CEC                            | 50  | 4.233E-01  | 2.193E-03 | 6.111E-03 |
| HDL in the H3P size range (µM) | ANG2                           | 50  | -2.718E-01 | 5.618E-02 | 1.016E-01 |
| HDL in the H3P size range (µM) | GlycA                          | 50  | 2.600E-01  | 6.825E-02 | 1.190E-01 |
| HDL in the H3P size range (µM) | BLC                            | 50  | -2.053E-01 | 1.527E-01 | 2.361E-01 |
| HDL in the H3P size range (µM) | B2M                            | 49  | -1.899E-01 | 1.912E-01 | 2.868E-01 |
| HDL in the H3P size range (µM) | Eotaxin-2                      | 50  | 1.593E-01  | 2.690E-01 | 3.779E-01 |
| HDL in the H3P size range (µM) | CitH3-DNA                      | 48  | -1.570E-01 | 2.865E-01 | 3.928E-01 |
| HDL in the H3P size range (µM) | Ficolin 3                      | 50  | 1.003E-01  | 4.882E-01 | 5.924E-01 |
| HDL in the H3P size range (µM) | Ferritin                       | 50  | -1.525E-02 | 9.163E-01 | 9.437E-01 |
| HDL in the H3P size range (µM) | HDL in the H3P size range (µM) | 50  | 1.000E+00  |           |           |
| Ficolin 3                      | B2M                            | 302 | 3.544E-01  | 2.292E-10 | 1.290E-09 |
| Ficolin 3                      | Ferritin                       | 303 | 3.304E-01  | 3.770E-09 | 1.910E-08 |
| Ficolin 3                      | BAFF                           | 303 | 2.844E-01  | 4.781E-07 | 2.090E-06 |
| Ficolin 3                      | ANG2                           | 303 | 2.534E-01  | 7.975E-06 | 3.110E-05 |
| Ficolin 3                      | BLC                            | 303 | 2.026E-01  | 3.875E-04 | 1.226E-03 |
| Ficolin 3                      | Eotaxin-2                      | 303 | -7.217E-02 | 2.103E-01 | 3.101E-01 |
| Ficolin 3                      | CitH3-DNA                      | 190 | 7.733E-02  | 2.889E-01 | 3.949E-01 |
| Ficolin 3                      | cHDLP (µM)                     | 50  | 8.726E-02  | 5.468E-01 | 6.423E-01 |
| Ficolin 3                      | CEC                            | 129 | -1.722E-02 | 8.464E-01 | 8.923E-01 |
| Ficolin 3                      | Apolipoprotein A1 (mg/dL)      | 50  | 9.864E-04  | 9.946E-01 | 9.946E-01 |
| Ficolin 3                      | Ficolin 3                      | 303 | 1.000E+00  |           |           |
| Ferritin                       | B2M                            | 302 | 2.612E-01  | 4.226E-06 | 1.700E-05 |
| Ferritin                       | ANG2                           | 303 | 1.724E-01  | 2.601E-03 | 7.064E-03 |
| Ferritin                       | Apolipoprotein A1 (mg/dL)      | 50  | -3.016E-01 | 3.330E-02 | 6.486E-02 |
| Ferritin                       | cHDLP (µM)                     | 50  | -2.897E-01 | 4.128E-02 | 7.811E-02 |
| Ferritin                       | BAFF                           | 303 | 1.160E-01  | 4.356E-02 | 8.171E-02 |
| Ferritin                       | CitH3-DNA                      | 190 | -2.981E-02 | 6.831E-01 | 7.640E-01 |
| Ferritin                       | BLC                            | 303 | 2.369E-02  | 6.813E-01 | 7.640E-01 |
| Ferritin                       | Eotaxin-2                      | 303 | 1.957E-02  | 7.344E-01 | 8.055E-01 |
| Ferritin                       | CEC                            | 129 | 1.675E-02  | 8.505E-01 | 8.942E-01 |
| Eotaxin-2                      | CitH3-DNA                      | 190 | -2.406E-01 | 8.283E-04 | 2.502E-03 |
| Eotaxin-2                      | Apolipoprotein A1 (mg/dL)      | 50  | 3.136E-01  | 2.656E-02 | 5.305E-02 |
| Eotaxin-2                      | cHDLP (µM)                     | 50  | 2.782E-01  | 5.044E-02 | 9.281E-02 |
| Eotaxin-2                      | CEC                            | 129 | 1.650E-01  | 6.171E-02 | 1.096E-01 |
| Eotaxin-2                      | ANG2                           | 303 | -9.977E-02 | 8.295E-02 | 1.406E-01 |
| Eotaxin-2                      | BAFF                           | 303 | -8.212E-02 | 1.539E-01 | 2.375E-01 |
| Eotaxin-2                      | B2M                            | 302 | 4.808E-02  | 4.051E-01 | 5.137E-01 |
| Eotaxin-2                      | BLC                            | 303 | -3.804E-02 | 5.095E-01 | 6.110E-01 |
| Eotaxin-2                      | Eotaxin-2                      | 303 | 1.000E+00  |           |           |
| cHDLP (µM)                     | Apolipoprotein A1 (mg/dL)      | 50  | 8.885E-01  | <E-14     | <E-14     |
| cHDLP (µM)                     | BAFF                           | 50  | -3.982E-01 | 4.183E-03 | 1.059E-02 |
| cHDLP (µM)                     | CEC                            | 50  | 3.833E-01  | 6.002E-03 | 1.448E-02 |
| cHDLP (µM)                     | ANG2                           | 50  | -3.270E-01 | 2.046E-02 | 4.307E-02 |
| cHDLP (µM)                     | B2M                            | 49  | -3.059E-01 | 3.253E-02 | 6.394E-02 |
| cHDLP (µM)                     | BLC                            | 50  | -2.377E-01 | 9.651E-02 | 1.604E-01 |
| cHDLP (µM)                     | cHDLP (µM)                     | 50  | 1.000E+00  |           |           |
| B2M                            | ANG2                           | 302 | 5.034E-01  | <E-14     | <E-14     |

|                           |                           |     |            |           |           |
|---------------------------|---------------------------|-----|------------|-----------|-----------|
| B2M                       | BAFF                      | 302 | 5.400E-01  | <E-14     | <E-14     |
| B2M                       | BLC                       | 302 | 3.458E-01  | 6.604E-10 | 3.600E-09 |
| B2M                       | Apolipoprotein A1 (mg/dL) | 49  | -1.627E-01 | 2.640E-01 | 3.720E-01 |
| B2M                       | B2M                       | 302 | 1.000E+00  |           |           |
| BLC                       | ANG2                      | 303 | 3.772E-01  | 1.106E-11 | 6.900E-11 |
| BLC                       | BAFF                      | 303 | 3.552E-01  | 1.946E-10 | 1.100E-09 |
| BLC                       | Apolipoprotein A1 (mg/dL) | 50  | -2.438E-01 | 8.803E-02 | 1.480E-01 |
| BAFF                      | ANG2                      | 303 | 5.373E-01  | <E-14     | <E-14     |
| BAFF                      | Apolipoprotein A1 (mg/dL) | 50  | -4.085E-01 | 3.232E-03 | 8.641E-03 |
| BAFF                      | BAFF                      | 303 | 1.000E+00  |           |           |
| Apolipoprotein A1 (mg/dL) | ANG2                      | 50  | -3.968E-01 | 4.335E-03 | 1.091E-02 |
| ANG2                      | ANG2                      | 303 | 1.000E+00  |           |           |

| Abbreviation  | Definition                                        |
|---------------|---------------------------------------------------|
| 21-IFNGS      | 21-gene interferon gene signature                 |
| ANG2          | Angiotensin 2                                     |
| B2M           | Beta 2 microglobulin                              |
| BAFF          | B-cell activating factor                          |
| BLC           | B-lymphocyte chemoattractant                      |
| CEC           | Cholesterol efflux capacity                       |
| cHDLP         | High-density lipoprotein particle count           |
| CitH3-DNA     | Citrullinated histone                             |
| HDL           | High-density lipoprotein                          |
| HDLC          | High-density lipoprotein cholesterol              |
| IR            | Insulin resistance                                |
| IFN- $\alpha$ | Interferon alpha                                  |
| IFN- $\gamma$ | Interferon gamma                                  |
| IgE           | Immunoglobulin E                                  |
| IL-10         | Interleukin-10                                    |
| IL1RII        | Interleukin 1 receptor type 2                     |
| IL-2          | Interleukin-2                                     |
| IP-10         | Interferon gamma induced protein 10               |
| ITAC          | Interferon-inducible T-cell alpha chemoattractant |
| MCP1          | Monocyte chemotactic protein 1                    |
| MCP2          | Monocyte chemotactic protein 2                    |
| MIP3- $\beta$ | Macrophage inflammatory protein 3 beta            |
| MPO-DNA       | Myeloperoxidase-DNA                               |
| NE-DNA        | Neutrophil elastase-DNA                           |
| TNF- $\alpha$ | Tumor necrosis factor alpha                       |
| TRAILR3       | TNF-related apoptosis-inducing ligand receptor 3  |
| TRLP          | Very large triglyceride-rich lipoprotein particle |
| VCAM1         | Vascular cell adhesion molecule 1                 |
